# Supplementary material for: Multi-omic characterization of bifunctional peroxidase 4-coumarate 3-hydroxylase knockdown in Brachypodium distachyon provides insights into lignin modification-associated pleiotropic effects
Source: Front Plant Sci. 2022 Sep 28;13:908649. doi: 10.3389/fpls.2022.908649 (PMC9554711; doi:10.3389/fpls.2022.908649)
Supplement: Supplementary file 3 [file Table_2.xlsx]

## Sheet: Supplement Table 2
Supplement Table 2: Abundance profile of proteins involved in the lignin biosynthetic pathway and flavonoid biosynthetic pathway. First table contains information about lignin biosynthesis proteins i.e. Arabidopsis orthologs, qualitative and quantativive analysis of all Brachypodium proteins involve in lignin biosynthesis pathway(DOI: 10.1093/plcell/koac171) along with additional peroxidases that…

## Sheet: Lignin biosynthesis proteins
At gene	At ID	Bd gene	Similarity (%)	Bd ID	Accession	Identified in this study	Significant	N: ANOVA p value	N: ANOVA q-value	C3H/APX-KD Vs. WT_log2FC	C3H/APX-KD Vs. TDNA-control_log2FC	TDNA-control Vs. WT_log2FC	C3H/APX-KD Vs. WT	C3H/APX-KD Vs. TDNA-control	TDNA-control Vs. WT
AtPAL1	AT2G37040	BdPTAL1	77	Bradi3G49250	I1IBR5	yes		0.957625	0.962404
AtPAL2	AT3G53260	BdPAL2	79	Bradi3G49260	I1IBR6	yes		0.612337	0.648289
AtPAL3	AT5G04230	BdPAL3	80	Bradi3G49270	I1IBR7
AtPAL4	AT3G10340	BdPAL4	80	Bradi3G49280	I1IBR8	yes		0.0789057	0.112894
		BdPAL5	81	Bradi3G48840	I1IBL7	yes		0.0792535	0.113302
		BdPAL6	77	Bradi3G47120	A0A0Q3JNS6	yes		0.20396	0.251992
		BdPAL7	78	Bradi3G47110	I1IAZ3	yes		0.20396	0.251992
		BdPAL8	80	Bradi5G15830	I1IZQ0	yes		0.138578	0.181577
AtC4H (CYP73A5/REF3)	AT2G30490	BdC4H1	86	Bradi2G53470	I1HSV5	yes	Yes	0.00920375	0.0179292	0.3701	0.4088	-0.0387	TRUE	TRUE	FALSE
		BdC4H2	78	Bradi2G31510	I1HKP5	yes		0.612016	0.648007
		BdC4H3	64	Bradi3G43160	I1I9K7	yes		0.60475	0.641628
AtHCT	AT5G48930	BdHCT1	77	Bradi5G14720	I1IZB2	yes		0.115185	0.15531
		BdHCT2	75	Bradi3G48530	I1IBH8	yes		0.349929	0.399789
		BdHCT3	62	Bradi1g47232	A0A0Q3S2B6	yes		6.66e-07	7.09e-06	-9.0895	-0.0167	-9.0729	TRUE	FALSE	TRUE
AtC3'H1 (CYP98A3/REF8)	At2g40890	BdC3'H1	76	Bradi2G21300	I1HI50	yes		0.00719148	0.0145013	0.1349	0.4645	-0.3296	FALSE	TRUE	FALSE
AtC3'H2(CYP98A8)	At1g74540	BdC3'H2	57	Bradi4g31380	I1IQH4	yes		0.0198324	0.0347229	-0.4287	-0.6131	0.1844	FALSE	TRUE	FALSE
AtC3'H3(CYP98A9)	At1g74550	BdC3'H3	55	Bradi4g31367	I1IQH3	yes		2.47e-05	0.00011862	-0.7928	-1.6083	0.8154	TRUE	TRUE	TRUE
		BdC3'H4	52	Bradi3g14390	A0A0Q3F9N7
		BdC3'H5	53	Bradi5g08570	I1IX87
		BdC3'H6	53	Bradi5g08374	I1IX87
		BdC3'H7	48	Bradi1g17180	I1GQZ0
AtTT7(CYP75B1, F3'H)	AT5G07990	BdF3'H/TT7	61	Bradi4G16560	I1IL68	yes		0.0555051	0.0832787
AtC3H/APX1	AT1G07890	BdC3H/APX1-1	79	Bradi1g65820	I1H6P1	yes	Yes	4.75e-05	0.000206512	-1.3021	-1.511	0.2089	TRUE	TRUE	FALSE
		BdC3H/APX1-2	79	Bradi1g65820	I1H6P2	yes	Yes	4.34e-05	0.00019131	-1.3329	-1.5346	0.2017	TRUE	TRUE	FALSE
		BdC3H/APX1-3	90	Bradi1g16510	I1GQU0	yes		0.0340361	0.0548855	-0.2409	-0.2258	-0.0152	FALSE	FALSE	FALSE
AtAPX5	AT4G35970	BdAPX5-1	68	Bradi5g03640	I1IWB9	yes	Yes	0.00066921	0.00192688	-0.7486	-1.0021	0.2534	TRUE	TRUE	FALSE
		BdAPX5-2	68	Bradi3g42340	I1IWC0	yes	Yes	0.000499733	0.00149958	-0.7907	-1.1079	0.3172	TRUE	TRUE	FALSE
AtCSE1	AT1G52760	BdCSE1	50	Bradi4g45360	I1IVC1	yes
		BdCSE2	50	Bradi2G12020	I1HF00	yes		0.10565	0.14432
AtCOMT	At5g54160	BdCOMT1	68	Bradi3g16530	I1I1F5	yes		0.289646	0.3388
		BdCOMT2	71	Bradi1g14870	A0A0Q3JQG9	yes		0.050978	0.0773161
		BdCOMT3	69	Bradi2g02380	I1HBR8	yes		0.477085	0.523279
		BdCOMT4	68	Bradi2g02390	I1HBR9
AtCCoAOMT1	At4g34050	BdCCoAOMT1	84	Bradi1g48370	I1H0Q2	yes		1.54e-05	8.14e-05	0.8988	1.3429	-0.4441	TRUE	TRUE	TRUE
AtCCoAOMT2	At1g24735	BdCCoAOMT2	67	Bradi3g39420	I1I899	yes		0.122067	0.163384
AtCCoAOMT3	At3g61990	BdCCoAOMT3	67	Bradi3g39400	I1I897	yes		0.337145	0.387231
AtCCoAOMT4	At3g62000	BdCCoAOMT4	64	Bradi3g39380	A0A0Q3JKH5, A0A0Q3FGP6	yes		0.153211	0.197249
AtCCoAOMT5	At1g67990	BdCCoAOMT5	65	Bradi4g33340	I1IR50
AtCCoAOMT6	At1g67980	BdCCoAOMT6	56	Bradi3g39410	I1I898
AtCCoAOMT7	At4g26220	BdCCoAOMT7	51	Bradi3g16950	A0A0Q3HPK4, A0A0Q3I473
At4CL1	At1g51680	Bd4CL1	73	Bradi3g37300	I1I7J1	yes		0.000115779	0.000433322	-0.468	0.6363	-1.1043	TRUE	TRUE	TRUE
At4CL2	At3g21240	Bd4CL2	75	Bradi3g05750	I1HXV5	yes		0.0122622	0.0229396	0.5491	0.9326	-0.3835	FALSE	TRUE	FALSE
At4CL3	At1g65060	Bd4CL3	66	Bradi1g31320	I1GVQ1, A0A0Q3L0P2	yes		0.0111526	0.0211365	0.5977	1.069	-0.4714	FALSE	TRUE	FALSE
At4CL4	At3g21230	Bd4CL4	67	Bradi3g52350	I1ICU8
		Bd4CL5	64	Bradi3g18960	I1I2A9
AtF5H1(CYP84A1/FAH)	At4g36220	BdF5H1	68	Bradi3g30590	A0A0Q3FH21	yes		0.565927	0.606504
AtF5H2(CYP84A4)	At5g04330	BdF5H2	62	Bradi1g36790	A0A2K2DN39	yes		0.0600856	0.0892608
		BdF5H3	60	Bradi1g77597	I1HAK1
		BdF5H4	56	Bradi1g77740	I1HAL7
		BdF5H5	54	Bradi4g31380	I1IQH4	yes		0.0198324	0.0347229	-0.4287	-0.6131	0.1844	FALSE	TRUE	FALSE
		BdF5H6	52	Bradi4g31367	I1IQH3	yes		2.47e-05	0.00011862	-0.7928	-1.6083	0.8154	TRUE	TRUE	TRUE
AtCCR1	At1g15950	BdCCR1	74	Bradi3g36887	I1I7E4	yes	Yes	0.014065	0.0258562	1.0177	1.1913	-0.1735	TRUE	TRUE	FALSE
AtCCR2	At1g80820	BdCCR2	75	Bradi4g08647	A0A0Q3L341
		BdCCR3	63	Bradi1g47300	I1H0C0,A0A0Q3JNE0	yes		0.00108372	0.00290959	2.0973	1.0487	1.0486	TRUE	TRUE	TRUE
		BdCCR4	63	Bradi3g19670	I1I2J1
AtCCR-like		BdCCR-like1	67	Bradi4g33907	I1IRB7
		BdCCR-like2	72	Bradi1g35742	I1GX77	yes		0.02668	0.0446721	-0.1694	-0.4962	0.3268	FALSE	TRUE	FALSE
		BdCCR-like3	65	Bradi1g35730	I1GX75	yes	Yes	0.0046851	0.0100766	-0.8603	-1.121	0.2607	TRUE	TRUE	FALSE
		BdCCR-like4	60	Bradi2g11337	A0A0Q3QRG0
		BdCCR-like5	64	Bradi1g35736	A0A0Q3H468	yes	Yes	0.000613612	0.0017854	-0.9141	-1.2207	0.3066	TRUE	TRUE	FALSE
AtCAD4 (CAD-C)	At3g19450	BdCAD1	82	Bradi3g06480	I1HY48, A0A2K2CVK2	yes		0.244877	0.293452
AtCAD5 (CAD-D)	At4g34230	BdCAD2	64	Bradi4g29780	I1IPY8	yes		0.226288	0.274862
		BdCAD3	60	Bradi4g29770	I1IPY7	yes		0.695131	0.724138
-	-	BdPMT1	100	Bradi2g36910	I1HM65	yes	Yes	9.57e-08	1.75e-06	1.5226	1.4017	0.1209	TRUE	TRUE	FALSE
		BdPMT2	70	Bradi4g06067	I1IHZ2
AtLAC4	AT2G38080	BdLAC4-1	79	Bradi1g74320	I1H9G1
AtLAC11	AT5G03260	BdLAC4-2	72	Bradi2g54680	I1HTA3	yes		0.252933	0.301767
AtLAC17	AT5G60020	BdLAC4-3	71	Bradi1g24880	I1GTI4
		BdLAC11-1	73	Bradi1g74320	I1H9G1
		BdLAC11-2	73	Bradi2g54680	I1HTA3	yes		0.252933	0.301767
		BdLAC17-1	82	Bradi1g24880	I1GTI4
		BdLAC17-2	81	Bradi2g23350	I1HIS1	yes		0.355666	0.405681
AtLAC12	AT5G21100	BdLAC12	67	Bradi1G37620	I1GXW0	yes	Yes	0.000153757	0.000551993	0.4703	0.6502	-0.1799	TRUE	TRUE	FALSE
AtLAC7	AT3G09220	BdLAC7-1	61	Bradi2G55050	I1HTF1	yes	Yes	7.79e-06	4.67e-05	-3.393	-3.2826	-0.1104	TRUE	TRUE	FALSE
		BdLAC7-2	65	Bradi4G39330	I1ITB5	yes	Yes	2.68e-08	7.4e-07	-5.8358	-5.7844	-0.0515	TRUE	TRUE	FALSE
AtPRX64	At5g42180	BdPRX64	62	Bradi3g60880	A0A2K2D641	yes		0.0317682	0.0517906	-0.5802	-0.5986	0.0183	FALSE	TRUE	FALSE
AtPRX66	At5g51890	BdPRX66	60	Bradi3g32130	I1I5Q6	yes		6.42e-06	3.99e-05	-5.8893	-0.0477	-5.8416	TRUE	FALSE	TRUE
AtPRX39	AT4G11290	BdPRX39	52	Bradi2G11295	I1HER4
AtPRX72	At5g66390	BdPRX72-1	74	Bradi2g40590	I1HNE3	yes		0.640491	0.674623
		BdPRX72-2	74	Bradi2g09660	I1HE70	yes		0.107344	0.146164
		BdPRX72-3	73	Bradi2g09690	I1HE73	yes		0.0717761	0.104154
		BdPRX72-4	73	Bradi2g09680	I1HE72	yes		0.262333	0.311077
		BdPRX72-5	71	Bradi5g10070	I1IXQ8
AtPrx17	At2g22420	PRX17	71	BRADI4g32810	A0A2K2CRW2	yes	Yes	0.00319317	0.0073153	-0.6509	-0.7352	0.0843	TRUE	TRUE	FALSE
AtPrx47	At4g33420	PRX47	57	BRADI3g13590	A0A2K2CWW9	yes	Yes	0.00187403	0.00463457	-1.5917	-2.4957	0.904	TRUE	TRUE	FALSE
AtPrx52	At5g05340	PRX52-1	57	BRADI1g41115	I1GYF3	yes	Yes	0.00405538	0.00891913	-1.505	-1.0876	-0.4174	TRUE	TRUE	FALSE
AtPrx52	At5g05340	PRX52-2	55	BRADI1g17850	A0A0Q3KU45	yes	Yes	1.27e-10	2.91e-08	-11.5079	-11.8179	0.31	TRUE	TRUE	FALSE
AtDIR10/ESB1	AT2G28670	-	<30	-	-
AtCHS (TT4)	AT5G13930	BdCHS/TT4	90	Bradi4g17230	I1ILF3	yes	Yes	0.00223186	0.00538284	-0.7289	-0.4327	-0.2963	TRUE	TRUE	FALSE
AtCHI (TT5)	AT3G55120	BdCHI/TT5	54	Bradi1g03840	I1GLL0	yes		0.148952	0.192873
		BdREF1		BRADI2g42360	I1HP11	yes	Yes	0.00278821	0.00653112	-0.9857	-0.8813	-0.1044	TRUE	TRUE	FALSE

## Sheet: Flavonoid biosynthesis proteins
Gene name	Enzymatic activity	Brachypodium homolog (based on maizeGDB)	Significantly changing
Zm00001d003525	chalcone reductase	BRADI5G11620	No
Zm00001d013991	naringenin-chalcone synthase	BRADI3G29230	No
Zm00001d007403	naringenin-chalcone synthase	BRADI4G17230	yes
Zm00001d032662	naringenin-chalcone synthase	BRADI3G29230	No
Zm00001d052673	naringenin-chalcone synthase	BRADI4G17230	yes
Zm00001d044683	Chalcone isomerase	BRADI4G44390	No
Zm00001d016144	Chalcone isomerase	BRADI3G10937	No
Zm00001d000357	Chalcone isomerase	BRADI1G46470	No
Zm00001d012972	Chalcone isomerase	BRADI1G03840	No
Zm00001d034635	Chalcone isomerase	BRADI1G03840	No
Zm00001d006630	Chalcone isomerase	BRADI1G24080	No
Zm00001d018278	Chalcone isomerase	BRADI3G57200	No
Zm00001d001927	Flavanone 3-dioxygenase	BRADI5G25407	No
Zm00001d049926	Flavanone 3-dioxygenase	BRADI3G42990	No
Zm00001d027423	Flavanone 3-dioxygenase	BRADI1G77040	yes
Zm00001d052999	Flavanone 3-dioxygenase	BRADI3G42990	No
Zm00001d032223	Flavanone 3-dioxygenase	BRADI5G13320	No
Zm00001d031926	Flavanone 3-dioxygenase	BRADI3G42990	No
Zm00001d002564	Flavanone 3-dioxygenase	BRADI5G19250	No
Zm00001d037487	Flavanone 3-dioxygenase	BRADI1G47850	No
Zm00001d001960	Flavanone 3-dioxygenase	BRADI5G25050	No
Zm00001d053144	anthocyanidin synthase	BRADI2G38870	No
Zm00001d042980	anthocyanidin synthase	BRADI2G54090	No
Zm00001d035462	anthocyanidin synthase	BRADI2G38220	No
Zm00001d012456	anthocyanidin synthase	BRADI2G54090	No
Zm00001d045055	anthocyanidin 3-O-glucosyltransferase	BRADI1G46850	No
Zm00001d052492	anthocyanidin 3-O-glucosyltransferase	BRADI1G33500	yes
Zm00001d052492	anthocyanidin 3-O-glucosyltransferase	BRADI1G33490	yes
