# Supplementary material for: Multi-omic characterization of bifunctional peroxidase 4-coumarate 3-hydroxylase knockdown in Brachypodium distachyon provides insights into lignin modification-associated pleiotropic effects
Source: Front Plant Sci. 2022 Sep 28;13:908649. doi: 10.3389/fpls.2022.908649 (PMC9554711; doi:10.3389/fpls.2022.908649)
Supplement: Supplementary file 7 [file Table_6.xlsx]

## Sheet: Supplement Table 6
Supplement Table 6: Differentially expressed genes from Brachypodium and Arabidopsis stem tissues between C3H/APX-KD and control. Biological processes enriched for significantly changing Brachypodium genes are shown in Supplement Figure 5 and for Arabidopsis genes are in tab " Arabi C3H-KD upregulated GO_BP" and "Arabi C3H-KD downreg GO_BP"

## Sheet: Brachypodium sig DEG
Gene Name	A Value	M Value or log2 FC (C3H KD-WT)	P Value (C3H KD-WT)
Bradi1g00600	3.005	-1.499	0.043
Bradi1g01692	5.689	1.004	0.018
Bradi1g01715	-1.992	-5.855	0
Bradi1g03483	-1.992	9.45	0.004
Bradi1g03500	3.424	-1.378	0.034
Bradi1g03510	4.48	-2.437	0
Bradi1g03770	1.4	4.321	0.008
Bradi1g03780	0.819	3.91	0.021
Bradi1g04150	5.15	1.922	0.015
Bradi1g04625	-1.992	7.793	0.018
Bradi1g05460	2.824	-1.831	0.004
Bradi1g05735	-1.992	9.274	0
Bradi1g06095	2.387	3.384	0.014
Bradi1g06190	3.601	3.03	0.003
Bradi1g06372	2.49	3.318	0.016
Bradi1g06980	3.94	2.535	0
Bradi1g07500	2.419	-2.933	0.001
Bradi1g07660	3.268	4.086	0
Bradi1g07870	4.439	1.291	0.029
Bradi1g09270	4.278	-1.385	0.044
Bradi1g10520	2.486	-1.836	0.015
Bradi1g12280	2.858	-1.893	0.019
Bradi1g12360	1.38	-3.993	0.004
Bradi1g13620	-1.992	7.263	0.005
Bradi1g14200	2.659	2.342	0.036
Bradi1g15340	3.021	-1.368	0.021
Bradi1g16630	2.59	1.837	0.043
Bradi1g17430	3.753	-1.203	0.022
Bradi1g17440	2.462	2.002	0.02
Bradi1g19470	4.654	-1.696	0.037
Bradi1g20280	2.424	-1.849	0.009
Bradi1g20460	3.836	2.483	0.003
Bradi1g20480	0.805	3.61	0.042
Bradi1g21095	3.719	-1.964	0
Bradi1g21466	1.415	6.012	0
Bradi1g21922	3.317	1.719	0.044
Bradi1g23350	5.727	1.015	0.022
Bradi1g24835	3.736	-2.597	0.015
Bradi1g24845	1.599	-3.683	0.001
Bradi1g25070	1.582	4.104	0
Bradi1g26260	-0.165	5.92	0.008
Bradi1g27095	4.988	1.741	0
Bradi1g28050	1.694	2.634	0.008
Bradi1g28196	1.867	2.416	0.01
Bradi1g29160	-1.992	6.686	0.002
Bradi1g30710	4.076	1.413	0.011
Bradi1g30870	1.678	3.494	0.02
Bradi1g31700	2.623	-1.68	0.012
Bradi1g31980	1.875	-1.724	0.035
Bradi1g33050	5.388	3.49	0
Bradi1g33890	-1.992	9.414	0
Bradi1g35736	3.34	-1.314	0.023
Bradi1g37112	3.668	-2.345	0
Bradi1g37870	4.391	-1.1	0.013
Bradi1g39671	2.17	-2.1	0.01
Bradi1g41115	2.422	-1.736	0.02
Bradi1g41993	3.584	-1.017	0.049
Bradi1g43905	1.022	2.908	0.043
Bradi1g44170	2.307	5.765	0
Bradi1g44470	3.115	4.004	0
Bradi1g44680	1.808	2.919	0.024
Bradi1g45644	1.377	5.811	0.006
Bradi1g46520	3.786	-1.031	0.031
Bradi1g46750	0.928	3.558	0.046
Bradi1g47517	-1.992	7.069	0.04
Bradi1g47519	-1.992	8.81	0.006
Bradi1g48292	2.412	-2.419	0.009
Bradi1g48320	1.643	2.485	0.026
Bradi1g49490	2.737	-1.58	0.022
Bradi1g49690	0.563	3.852	0.045
Bradi1g49765	3.753	1.506	0.004
Bradi1g50440	1.591	-2.028	0.042
Bradi1g51540	7.095	2.791	0
Bradi1g51770	3.65	-2.493	0
Bradi1g51800	1.081	-5.063	0
Bradi1g52643	0.466	3.638	0.041
Bradi1g52646	3.041	-2.244	0.002
Bradi1g53770	3.738	2.619	0.001
Bradi1g54663	3.383	2.638	0.047
Bradi1g54800	4.607	1.377	0.006
Bradi1g55488	6.033	-1.054	0.006
Bradi1g55780	4.234	1.64	0.016
Bradi1g56616	5.957	4	0.006
Bradi1g57180	1.576	2.209	0.042
Bradi1g57280	5.043	-3.238	0
Bradi1g57285	4.877	-5.017	0
Bradi1g57337	5.423	1.92	0.001
Bradi1g57590	1.425	-3.26	0.002
Bradi1g58857	-1.992	8.51	0
Bradi1g59240	-1.992	7.711	0.001
Bradi1g60550	2.758	-1.596	0.027
Bradi1g63260	1.977	-1.726	0.045
Bradi1g63372	-1.992	-5.327	0
Bradi1g63480	4.713	1.781	0.035
Bradi1g63816	1.614	-2.429	0.023
Bradi1g64050	1.958	2.782	0.034
Bradi1g64280	0.936	3.788	0.007
Bradi1g64920	5.718	-1.65	0.001
Bradi1g65440	5.828	1.328	0.049
Bradi1g65540	4.208	-1.069	0.026
Bradi1g65810	4.461	1.877	0.001
Bradi1g66280	4.456	-1.4	0.003
Bradi1g66590	6.541	1.152	0.021
Bradi1g68340	3.752	1.089	0.044
Bradi1g69900	2.402	1.742	0.028
Bradi1g70165	2.48	3.318	0.028
Bradi1g71490	2.074	-2.666	0.01
Bradi1g71540	3.821	2.089	0.019
Bradi1g71920	4.361	2.193	0.001
Bradi1g71948	3.718	1.902	0.023
Bradi1g71960	4.133	2.456	0.017
Bradi1g71975	1.611	3.716	0.014
Bradi1g72449	4.506	2.305	0.016
Bradi1g72590	1.959	2.699	0.037
Bradi1g72963	2.562	1.855	0.02
Bradi1g73100	3.992	-1.307	0.006
Bradi1g74350	3.521	2.265	0.004
Bradi1g74970	-1.992	9.744	0
Bradi1g74980	2.374	6.177	0
Bradi1g76200	3.766	-2.425	0
Bradi1g76294	-1.992	-5.002	0
Bradi1g76420	5.394	-1.157	0.009
Bradi1g77040	4.154	-1.531	0.004
Bradi1g77320	4.033	-1	0.031
Bradi1g78246	4.923	-1.854	0
Bradi1g78670	-1.992	-5.865	0
Bradi1g78772	2.511	2.141	0.013
Bradi1g78790	4.698	-1.198	0.018
Bradi2g00240	1.658	-1.874	0.033
Bradi2g00455	-1.992	8.631	0.007
Bradi2g01910	4.296	-2.486	0
Bradi2g02150	3.294	-1.759	0.017
Bradi2g02560	4.117	-1.151	0.02
Bradi2g02622	-1.992	7.178	0.032
Bradi2g04990	3.015	2.004	0.032
Bradi2g05832	3.765	1.363	0.033
Bradi2g05850	2.615	2.317	0.006
Bradi2g06090	2.335	1.843	0.029
Bradi2g06300	6.639	1.354	0.045
Bradi2g07096	3.392	-1.473	0.02
Bradi2g07380	5.194	1.261	0.006
Bradi2g07573	-1.992	-4.722	0
Bradi2g07760	3.227	-1.478	0.022
Bradi2g07820	2.129	1.619	0.046
Bradi2g08870	3.218	-2.692	0
Bradi2g09995	-1.992	-8.475	0
Bradi2g10681	-1.992	9.015	0
Bradi2g10700	0.844	3.102	0.014
Bradi2g11567	3.258	-2.405	0.001
Bradi2g11740	3.412	2	0.038
Bradi2g11940	5.435	1.828	0.001
Bradi2g12960	-1.992	-5.847	0
Bradi2g13470	5.836	-1.54	0
Bradi2g13600	3.79	2.168	0.003
Bradi2g14132	1.874	2.879	0.005
Bradi2g15540	1.266	3.611	0
Bradi2g15940	3.474	-1.341	0.021
Bradi2g16170	2.031	-1.644	0.023
Bradi2g17530	4.969	2.043	0.05
Bradi2g17820	-1.992	6.809	0.019
Bradi2g18106	5.964	-1.725	0.003
Bradi2g18120	2.627	1.75	0.025
Bradi2g18137	1.869	-2.783	0.005
Bradi2g18237	2.402	2.469	0.048
Bradi2g18447	3.182	1.32	0.021
Bradi2g18630	7.146	1.111	0.004
Bradi2g19209	7.326	1.705	0.047
Bradi2g19350	2.032	-1.976	0.032
Bradi2g19415	1.049	5.999	0
Bradi2g19505	-1.992	-5.472	0
Bradi2g19610	2.034	-2.378	0.002
Bradi2g21060	4.232	2.997	0
Bradi2g22446	-1.992	8.7	0
Bradi2g23435	-1.992	-7.288	0
Bradi2g23540	5.721	-2.188	0.002
Bradi2g24246	6.031	1.257	0.047
Bradi2g24435	6.59	-2.513	0.007
Bradi2g26903	-1.992	12.859	0.002
Bradi2g27050	1.622	2.801	0.025
Bradi2g27140	3.959	-1.56	0.001
Bradi2g27830	3.298	-1.27	0.029
Bradi2g31084	-1.992	-6.289	0
Bradi2g33100	4.056	1.978	0.016
Bradi2g33263	-1.992	8.004	0.003
Bradi2g33312	2.09	2.466	0.002
Bradi2g33540	2.182	2.209	0.042
Bradi2g33610	3.648	-1.073	0.041
Bradi2g33690	3.832	1.306	0.014
Bradi2g35130	1.43	-3.298	0.002
Bradi2g35317	-1.992	-7.929	0
Bradi2g35825	3.841	-1.265	0.025
Bradi2g35850	2.493	3.186	0.012
Bradi2g35860	4.504	1.451	0.033
Bradi2g36612	3.176	-1.56	0.039
Bradi2g38163	2.458	2.768	0.013
Bradi2g38247	4.704	1.613	0.041
Bradi2g39220	3.371	1.638	0.007
Bradi2g39265	5.465	-2.095	0.001
Bradi2g39272	2.805	-2.262	0.001
Bradi2g39290	2.389	-1.983	0.049
Bradi2g39706	-1.992	-5.373	0
Bradi2g39830	4.161	-1.561	0.005
Bradi2g41288	4.446	1.759	0.008
Bradi2g42607	3.608	1.277	0.03
Bradi2g42633	0.86	2.765	0.04
Bradi2g42855	8.901	2.222	0.029
Bradi2g44270	4.094	1.997	0.012
Bradi2g45390	4.565	-1.127	0.01
Bradi2g45700	4.026	-1.019	0.046
Bradi2g45980	3.857	-1.199	0.016
Bradi2g46093	2.08	3.753	0.002
Bradi2g46266	3.578	1.655	0.017
Bradi2g46345	1.07	3.655	0.003
Bradi2g46810	3.371	2.949	0.001
Bradi2g47501	-1.992	6.762	0.019
Bradi2g47700	5.506	-1.769	0.009
Bradi2g47710	3.394	-1.293	0.036
Bradi2g47730	1.202	3.275	0.035
Bradi2g48160	3.961	3.51	0
Bradi2g48730	0.969	4.777	0.008
Bradi2g49000	6.642	1.429	0.022
Bradi2g49067	1.885	2.466	0.02
Bradi2g49280	3.777	1.292	0.021
Bradi2g49740	4.187	1.008	0.045
Bradi2g50532	2.539	-2.4	0.009
Bradi2g50950	0.374	4.408	0.041
Bradi2g51830	1.819	5.043	0
Bradi2g52310	4.179	2.157	0.001
Bradi2g52370	4.087	1.986	0.018
Bradi2g52987	2.224	1.967	0.045
Bradi2g53260	3.586	1.133	0.033
Bradi2g53520	0.668	3.586	0.011
Bradi2g54224	5.566	-2.122	0.036
Bradi2g54226	6.498	1.226	0.004
Bradi2g54400	2.91	1.994	0.003
Bradi2g54810	3.766	1.152	0.049
Bradi2g54910	0.975	3.23	0.005
Bradi2g54960	4.208	-1.325	0.006
Bradi2g55310	2.165	3.151	0.008
Bradi2g55920	3.371	3.94	0.001
Bradi2g55924	-1.992	7.228	0
Bradi2g56037	4.663	-2.302	0.001
Bradi2g57100	4.549	1.003	0.029
Bradi2g57332	1.404	4.707	0.001
Bradi2g59890	2.844	1.591	0.027
Bradi2g59920	4.102	2.83	0.001
Bradi2g60340	4.059	2.65	0
Bradi2g60660	3.282	2.468	0.009
Bradi2g60680	3.993	1.526	0.019
Bradi2g61150	1.553	5.167	0
Bradi3g01920	3.844	-1.025	0.035
Bradi3g02300	3.349	-1.959	0.001
Bradi3g03597	2.445	1.581	0.031
Bradi3g04026	1.424	-3.275	0.003
Bradi3g04750	2.1	2.468	0.007
Bradi3g05780	4.397	-1.019	0.014
Bradi3g06070	4.721	1.823	0.04
Bradi3g06472	3.633	2.007	0.024
Bradi3g07010	4.937	-2.128	0.007
Bradi3g07170	4.259	1.23	0.028
Bradi3g07790	3.281	-1.495	0.006
Bradi3g07980	6.157	-1.532	0.004
Bradi3g08382	2.526	1.651	0.033
Bradi3g08690	5.249	1.113	0.011
Bradi3g09100	-0.97	6.73	0.027
Bradi3g09120	4.357	-1.315	0.018
Bradi3g09350	2.787	-1.905	0.01
Bradi3g10510	3.255	2.592	0.003
Bradi3g10710	4.378	1.837	0.005
Bradi3g11800	0.471	3.593	0.032
Bradi3g13150	2.458	-2.098	0.041
Bradi3g13533	-1.992	6.753	0.019
Bradi3g14035	1.119	-4.197	0.002
Bradi3g14710	2.55	-2.675	0.006
Bradi3g14946	3.641	3.157	0
Bradi3g15040	2.973	-2.177	0.037
Bradi3g15560	5.293	2.165	0.011
Bradi3g15760	-1.992	7.148	0.008
Bradi3g15783	1.93	2.708	0.049
Bradi3g16616	4.109	3.377	0
Bradi3g16650	-1.992	11.722	0
Bradi3g17509	-1.992	6.72	0.05
Bradi3g17715	1.433	3.839	0.017
Bradi3g17722	2.957	2.007	0.033
Bradi3g18070	2.395	2.981	0.017
Bradi3g19680	6.46	1.117	0.047
Bradi3g19730	5.065	-1.594	0.015
Bradi3g21150	6	-2.292	0.001
Bradi3g22365	2.965	1.81	0.037
Bradi3g22802	3.855	-1.482	0.03
Bradi3g24676	4.502	1.021	0.031
Bradi3g26640	3.018	-2.172	0
Bradi3g26690	2.115	1.92	0.036
Bradi3g26944	3.694	1.271	0.028
Bradi3g26958	3.72	1.671	0.001
Bradi3g27541	2.328	2.362	0.039
Bradi3g28302	1.497	-2.961	0.01
Bradi3g29165	2.896	2.026	0.013
Bradi3g30510	4.611	1.316	0.017
Bradi3g30655	-1.992	-12.367	0
Bradi3g30730	2.904	1.848	0.01
Bradi3g31560	2.369	-2.808	0
Bradi3g31720	2.004	6.379	0
Bradi3g31727	2.818	1.638	0.047
Bradi3g31777	3.062	1.829	0.007
Bradi3g32427	2.058	1.871	0.027
Bradi3g32551	5.835	-1.073	0.008
Bradi3g32770	1.525	-1.984	0.042
Bradi3g33120	1.433	-2.164	0.049
Bradi3g34180	4.022	-1.077	0.032
Bradi3g34720	3.98	-1.608	0.001
Bradi3g34727	5.704	-2.279	0
Bradi3g35560	5.268	1.24	0.025
Bradi3g35726	2.861	-1.535	0.019
Bradi3g37480	4.773	1.094	0.014
Bradi3g38169	3.087	1.897	0.008
Bradi3g38410	5.026	2.078	0.004
Bradi3g38980	3.532	1.885	0.012
Bradi3g39110	5.75	1.011	0.025
Bradi3g39850	5.648	1.272	0.011
Bradi3g40759	3.836	1.493	0.003
Bradi3g41211	4.557	-1.017	0.039
Bradi3g41825	-1.992	7.904	0.015
Bradi3g43857	4.393	-1.347	0.04
Bradi3g44010	5.042	1.351	0.005
Bradi3g45270	1.489	-2.166	0.029
Bradi3g45930	5.669	-1.027	0.007
Bradi3g45977	3.323	1.711	0.008
Bradi3g46830	2.977	1.388	0.044
Bradi3g47010	2.058	2.02	0.036
Bradi3g47220	1.897	3.283	0.001
Bradi3g47232	3.39	3.463	0
Bradi3g47500	4.566	1.16	0.017
Bradi3g47627	1.597	2.51	0.015
Bradi3g48610	2.155	-1.621	0.04
Bradi3g49020	1.482	3.171	0.042
Bradi3g49190	1.577	2.976	0.033
Bradi3g49660	1.795	2.033	0.049
Bradi3g49915	2.995	1.477	0.018
Bradi3g50000	3.305	1.392	0.014
Bradi3g50420	5.051	1.342	0.026
Bradi3g50430	1.444	2.951	0.044
Bradi3g50490	2.705	3.593	0.003
Bradi3g50690	1.72	-2.452	0.018
Bradi3g50850	1.368	2.349	0.035
Bradi3g51777	2.041	3.017	0.006
Bradi3g51810	3.108	3.314	0.001
Bradi3g52016	3.16	1.434	0.038
Bradi3g52367	4.459	1.037	0.019
Bradi3g52660	3.499	1.467	0.044
Bradi3g52830	3.929	1.295	0.015
Bradi3g53743	2.078	-1.868	0.022
Bradi3g54010	3.46	1.455	0.007
Bradi3g54210	5.744	1.337	0.014
Bradi3g55090	4.517	1.848	0.001
Bradi3g55885	-1.992	-6.153	0
Bradi3g56290	2.053	-2.909	0.001
Bradi3g56460	6.536	1.047	0.008
Bradi3g57230	2.986	2.553	0
Bradi3g57450	5.37	-2.074	0
Bradi3g57525	2.009	2.118	0.029
Bradi3g58240	4.498	1.303	0.033
Bradi3g58590	0.015	5.022	0.006
Bradi3g58630	3.231	2.11	0.008
Bradi3g59760	3.978	1.625	0.037
Bradi3g60360	1.788	3.674	0.001
Bradi3g60470	5.286	1.245	0.013
Bradi4g01950	4.701	1.814	0.017
Bradi4g02575	2.27	2.021	0.032
Bradi4g03140	1.914	2.224	0.027
Bradi4g04244	3.371	2.358	0.02
Bradi4g05650	0.736	-5.106	0
Bradi4g07130	6.822	-1.341	0.005
Bradi4g07527	4.039	1.579	0.038
Bradi4g07740	2.3	2.061	0.04
Bradi4g09417	4.699	-1.346	0.017
Bradi4g09740	3.929	-2.565	0
Bradi4g09750	4.808	-2.227	0
Bradi4g10158	3.35	-1.287	0.023
Bradi4g10426	2.211	1.985	0.042
Bradi4g11122	1.456	-3.078	0.006
Bradi4g14692	-1.992	-5.367	0
Bradi4g16023	-1.992	7.224	0.032
Bradi4g16620	2.34	-2.459	0.001
Bradi4g16841	0.334	4.908	0.006
Bradi4g17200	3.326	-2.645	0.001
Bradi4g18820	4.372	-1.537	0.003
Bradi4g19525	2.596	-1.917	0.026
Bradi4g20741	4.286	1.09	0.031
Bradi4g21680	2.539	-1.315	0.049
Bradi4g22175	2.111	1.905	0.033
Bradi4g22435	3.078	-1.897	0.016
Bradi4g22620	5.925	2.181	0.004
Bradi4g22653	2.539	2.384	0.04
Bradi4g23356	2.561	-2.085	0.004
Bradi4g25938	-1.992	-5.301	0
Bradi4g26354	3.325	1.382	0.035
Bradi4g27148	1.504	-2.483	0.023
Bradi4g27787	2.357	-2.746	0.004
Bradi4g28280	3.189	4.026	0
Bradi4g29360	-0.34	5.728	0.021
Bradi4g29530	1.108	4.249	0.004
Bradi4g30100	4.984	3.638	0
Bradi4g30380	3.065	2.835	0.005
Bradi4g30670	-1.992	11.035	0.002
Bradi4g30710	5.423	1.686	0.012
Bradi4g30760	-1.992	-5.09	0
Bradi4g31030	5.082	1.191	0.004
Bradi4g31670	2.967	2.423	0.001
Bradi4g32690	1.574	2.592	0.037
Bradi4g33288	2.985	1.302	0.039
Bradi4g33400	2.379	-3.152	0
Bradi4g33878	5.34	1.335	0.002
Bradi4g35470	1.982	1.86	0.049
Bradi4g35650	0.698	6.512	0
Bradi4g35770	1.151	3.675	0.03
Bradi4g36968	0.924	4.838	0
Bradi4g39310	3.498	-1.746	0.001
Bradi4g39435	3.031	2.258	0.016
Bradi4g39910	7.505	-1.781	0.003
Bradi4g40970	4.663	-1.227	0.014
Bradi4g41505	-1.992	9.903	0.003
Bradi4g42655	3.691	1.283	0.026
Bradi4g43090	4.744	-1.154	0.009
Bradi4g44410	10.44	1.156	0.02
Bradi4g44460	5.962	-1.055	0.037
Bradi4g44496	4.018	-2.987	0
Bradi4g45010	4.024	-1.832	0
Bradi4g45100	3.136	1.492	0.022
Bradi5g01240	4.14	1.303	0.017
Bradi5g01381	0.422	3.743	0.003
Bradi5g02810	4.594	-2.366	0
Bradi5g02820	4.15	-2.441	0
Bradi5g02830	2.917	-2.713	0
Bradi5g02831	4.696	-3.41	0
Bradi5g02836	3.747	-2.211	0.008
Bradi5g04560	6.753	1.03	0.039
Bradi5g07149	-1.992	-6.577	0
Bradi5g08265	-1.992	-6.273	0
Bradi5g08490	4.922	1.064	0.022
Bradi5g10450	2.008	-1.923	0.016
Bradi5g11970	0.565	4.585	0.008
Bradi5g12530	5.57	1.203	0.011
Bradi5g12865	0.668	-4.484	0
Bradi5g13722	4.577	1.126	0.019
Bradi5g15350	1.502	-2.389	0.026
Bradi5g15760	5.375	1.18	0.025
Bradi5g16690	4.021	1.185	0.031
Bradi5g17575	-1.992	-5.932	0
Bradi5g18843	2.058	-2.278	0.035
Bradi5g19100	2.012	3.331	0.014
Bradi5g19180	2.961	1.975	0.045
Bradi5g20424	1.601	2.739	0.046
Bradi5g20540	3.691	3.508	0
Bradi5g20607	4.585	1.138	0.008
Bradi5g21130	3.25	1.296	0.047
Bradi5g21250	4.375	2.765	0.001
Bradi5g21350	4.954	1.563	0.026
Bradi5g21531	3.577	2.232	0.021
Bradi5g21850	2.226	-1.806	0.025
Bradi5g23135	4.452	1.78	0.025
Bradi5g23166	7.067	-1.265	0.021
Bradi5g25570	1.294	3.231	0.028
Bradi5g25900	2.729	2.22	0.01
Bradi5g26320	6.033	-1.721	0.016
Bradi5g26567	2.637	1.962	0.027
Bradi5g26610	4.697	2.156	0.001
Bradi5g26650	1.851	4.018	0.012
Bradi5g27073	-1.992	7.883	0.016
Bradi5g27150	2.396	-2.586	0.004
Bradi5g27160	5.378	-1.356	0.013

## Sheet: Arabidopsis sig DEG
Gene Name	A Value	M Value or log2 FC (C3H KD-WT)	P Value (C3H KD-WT)
AT1G01130	2.551	-1.729	0.043
AT2G15029	-3.07	14.732	0.004
AT1G01225	2.199	-1.562	0.001
ATCG00690	-3.07	14.038	0.005
AT1G01840	0.563	-1.645	0.026
AT1G02220	3.133	-1.296	0
AT2G01023	-3.07	13.434	0.007
AT2G07684	-3.07	12.804	0.01
ATCG00760	-3.07	12.601	0.011
AT1G02820	2.915	-1.308	0.009
AT4G05071	-3.07	12.515	0.012
AT1G03055	2.297	-2.47	0
AT1G03170	0.927	-1.706	0.019
AT3G14452	-3.07	12.294	0.013
AT4G31441	-3.07	12.074	0.015
AT1G03820	6.76	-1.094	0
AT3G25014	-3.07	12.072	0.015
AT3G61117	-3.07	12.018	0.015
AT1G04240	5.666	-1.228	0
AT2G23321	-3.07	11.679	0.018
AT1G04290	5.168	-1.037	0.002
AT3G15635	-3.07	11.022	0
AT1G05065	3.304	-1.24	0.004
ATCG00630	-3.07	10.659	0.032
AT3G52075	-3.07	10.505	0.014
AT1G15010	-3.07	9.737	0
AT2G36854	-3.07	9.648	0.016
AT2G18685	-3.07	9.073	0.006
AT5G15745	-3.07	8.697	0.008
AT5G51465	-3.07	8.288	0
AT1G06830	4.334	-1.928	0
AT2G35935	-3.07	8.184	0
AT2G15780	-3.07	8.074	0.004
AT4G24030	-3.07	8.062	0
AT1G07610	2.4	-1.007	0.027
AT3G26135	-3.07	7.932	0.03
AT5G22380	-3.07	7.904	0
AT4G27654	2.192	7.885	0
AT5G06730	-3.07	7.741	0.017
AT1G12672	-3.07	7.727	0.012
AT1G07900	-3.07	7.679	0
AT1G09750	1.917	-2.1	0.001
AT1G09812	2.918	-1.243	0.01
AT4G24110	-3.07	7.668	0.001
AT5G17350	-3.07	7.582	0.001
AT3G18775	-3.07	7.505	0.007
AT3G28340	-3.07	7.503	0.001
AT4G01360	-3.07	7.346	0
AT1G76650	2.794	7.286	0
AT5G09876	-3.07	7.274	0
AT1G33760	-3.07	7.172	0
AT1G11390	1.52	-1.3	0.013
AT1G11545	1.596	-2.216	0
AT4G39670	-3.07	7.159	0
AT5G21960	-0.141	7.08	0
ATMG01220	-3.07	7.08	0.04
AT2G36450	-3.07	7.025	0.001
AT1G12090	3.257	-1.165	0.03
AT5G44063	-3.07	7.004	0.047
AT1G12550	3.195	-1.033	0.021
AT5G64110	2.091	6.928	0.005
AT1G12610	-3.07	6.853	0.002
AT5G62520	-3.07	6.835	0
AT5G57560	3.466	6.813	0
AT1G19210	-3.07	6.785	0.041
AT1G59920	-3.07	6.758	0.006
AT1G13600	4.575	-1.109	0
AT1G58420	-3.07	6.725	0.003
AT5G24110	-1.609	6.724	0.005
AT1G50745	-3.07	6.654	0.01
AT1G14190	2.79	-1.083	0.012
AT3G44350	-3.07	6.649	0.005
AT3G23250	1.217	6.625	0
AT5G19880	-3.07	6.617	0.027
AT1G14642	8.75	-6.141	0.001
AT5G46295	-3.07	6.506	0.045
AT5G52020	-3.07	6.498	0.003
AT1G56240	-3.07	6.431	0.001
AT4G34410	1.926	6.428	0
AT1G66160	-1.546	6.403	0.006
AT1G15550	2.162	-1.047	0.019
AT1G14540	-3.07	6.393	0.029
AT5G42380	0.899	6.346	0
AT1G16730	2.969	-1.039	0.004
AT1G64160	-3.07	6.319	0.017
AT2G19960	-3.07	6.319	0.036
AT4G37290	-3.07	6.311	0.043
AT1G18250	3.391	-1.126	0.001
AT2G32130	-3.07	6.306	0.032
AT1G11925	-3.07	6.292	0.024
AT2G44840	1.703	6.252	0
AT3G47380	-3.07	6.202	0.019
AT3G02840	0.835	6.184	0
AT1G19050	5.718	-1.667	0
AT1G19070	0.823	-3.149	0.024
AT3G61190	1.063	6.148	0
AT3G20340	4.801	6.11	0
AT5G59820	2.843	6.099	0
AT5G64450	-3.07	6.073	0.05
AT4G24570	4.511	6.033	0
AT4G10265	-3.07	5.968	0.033
AT5G01380	-3.07	5.962	0.023
AT1G20470	3.742	-1.11	0.004
AT3G59295	-3.07	5.904	0.038
AT5G45340	2.313	5.875	0
AT1G21050	5.041	-1.159	0
AT4G21840	-3.07	5.801	0.044
AT3G01830	1.301	5.655	0
AT1G30135	1.798	5.515	0
AT5G64870	-0.209	5.476	0
AT5G13080	1.97	5.443	0
AT1G21695	1.424	-1.246	0.029
AT2G27660	-0.327	5.441	0
AT1G80840	3.605	5.383	0
AT2G34600	1.43	5.308	0
AT5G22240	-0.95	5.271	0.006
AT4G36430	2.602	5.235	0.001
AT1G23340	3.299	-1.321	0
AT3G46080	-1.113	5.206	0.003
AT1G23465	2.046	-1.943	0.005
AT2G22880	3.117	5.204	0
AT2G40113	-1.154	5.188	0.042
AT1G50750	-0.377	5.081	0.002
AT1G24020	4.049	-1.483	0
AT4G29780	4.293	5.062	0
AT3G11340	-1.137	5.053	0.004
AT5G51190	4.383	5.022	0
AT1G24735	3.02	-1.329	0.006
AT2G25460	-0.74	4.898	0.001
AT1G25470	3.927	-1.388	0.005
AT1G25510	1.583	-1.389	0.008
AT4G25490	-1.118	4.855	0.02
AT1G68840	1.717	4.819	0
AT1G07135	3.762	4.812	0
AT1G27565	-3.07	-7.025	0
AT4G13395	2.294	4.81	0
AT2G05510	1.751	4.805	0.005
AT1G28290	7.12	-1.352	0
AT3G47480	0.068	4.794	0.001
AT4G17490	3.259	4.727	0
AT1G35140	-0.665	4.693	0.003
AT3G10930	3.006	4.65	0
AT2G35980	0.37	4.643	0.024
AT3G44260	4.868	4.634	0
AT1G13670	-0.469	4.609	0.001
AT1G31490	2.961	-1.381	0
AT5G52050	0.353	4.577	0
AT1G19020	2.356	4.544	0
AT1G32240	3.611	-1.083	0.005
AT4G27280	4.704	4.542	0
AT5G28237	-0.638	4.541	0.005
AT1G57630	1.564	4.539	0
AT1G74930	2.919	4.531	0
AT1G06150	6.992	4.53	0.016
AT5G09290	-0.83	4.496	0.007
AT1G61280	-1.22	4.493	0.019
AT5G48540	2.243	4.458	0
AT1G32350	0.397	4.448	0.001
AT5G64120	5.252	4.441	0.002
AT5G42830	0.738	4.423	0
AT3G14463	-1.254	4.411	0.032
AT2G27080	3.173	4.381	0
AT1G28480	3.635	4.369	0
AT1G28370	3.859	4.32	0
AT1G47485	2.638	-2.571	0
AT5G05365	1.004	4.307	0
AT1G48480	2.718	-1.015	0.011
AT1G61470	0.417	4.291	0.005
AT1G75945	4.454	4.288	0
AT1G24145	2.499	4.276	0
AT1G65500	5.287	4.267	0
AT5G27420	3.637	4.264	0
AT1G51060	5.477	-1.215	0
AT5G65690	-0.614	4.239	0.003
AT5G67080	1.313	4.232	0
AT1G52827	3.114	-1.024	0.037
AT5G66335	0.106	4.143	0.012
AT4G25470	0.793	4.134	0.007
AT1G53035	3.024	-1.114	0.029
AT1G53490	2.517	-4.318	0
AT4G23810	3.747	4.131	0
AT1G53920	0.508	-2.138	0.002
AT2G28400	0.846	4.118	0
AT1G19380	3.41	4.072	0
AT4G36950	0.224	4.069	0
AT5G10625	0.5	4.05	0
AT5G64810	1.398	4.05	0
AT5G05340	3.995	4.016	0
AT3G04640	4.461	4.009	0
AT1G56430	5.671	-1.004	0
AT1G69930	-0.344	4.001	0.043
AT4G28040	1.091	3.998	0.007
AT3G29000	2.351	3.991	0
AT1G58170	2.648	-1.101	0.006
AT1G64220	2.603	3.99	0.001
AT2G46400	3.275	3.93	0
AT3G09940	3.122	3.904	0
AT1G59740	2.924	-1.666	0
AT2G32140	1.493	3.901	0
AT2G40000	6.73	3.899	0
AT1G60530	3.04	-1.031	0.017
AT1G60960	4.256	-1.109	0
AT5G64100	1.234	3.865	0.049
AT5G41750	2.32	3.859	0
AT4G11280	3.331	3.82	0
AT2G04495	-0.843	3.809	0.015
AT1G01560	0.428	3.808	0
AT1G24140	2.039	3.789	0
AT1G76600	3.933	3.751	0
AT3G48520	0.713	3.749	0.001
AT1G62045	3.227	-1.249	0
AT1G62290	2.938	-1.22	0.001
AT4G01985	0.212	3.749	0.05
AT3G28580	2.899	3.742	0
AT1G62870	1.793	-1.432	0.006
AT5G61600	5.923	3.734	0
AT3G59440	-0.821	3.712	0.026
AT1G74450	3.834	3.698	0
AT1G18300	4.042	3.674	0
AT3G25780	4.194	3.669	0
AT2G02010	0.455	3.667	0.01
AT1G64185	2.732	-1.349	0.002
AT3G19580	4.551	3.649	0
AT1G14870	3.271	3.648	0
AT1G64625	2.573	-1.102	0.005
AT4G32480	4.703	3.64	0
AT5G50915	0.667	3.635	0.008
AT1G27730	5.997	3.608	0
AT1G64780	3.138	-1.257	0
AT1G23710	4.651	3.578	0
AT2G46940	-0.673	3.578	0.008
AT4G34139	1.462	3.561	0
AT1G32928	3.166	3.555	0
AT4G21850	1.455	3.549	0
AT5G47230	3.434	3.517	0
AT1G61120	1.142	3.501	0
AT1G66400	0.938	3.46	0.027
AT2G22500	4.843	3.46	0
AT1G79130	-0.071	3.443	0.029
AT5G46730	2.021	3.418	0.014
AT3G55980	5.894	3.402	0
AT2G20670	4.298	3.387	0
AT3G50930	4.74	3.381	0
AT3G48360	3.579	3.375	0
AT4G37610	3.831	3.375	0
AT4G20860	2.826	3.367	0
AT4G39830	-0.189	3.353	0.002
AT3G50060	3.35	3.339	0
AT1G33055	2.95	3.323	0
AT4G27657	2.199	3.32	0.017
AT1G68238	5.014	-1.125	0.011
AT1G68360	4.481	-1.539	0
AT1G68550	4.56	-1.338	0
AT4G27652	4.161	3.319	0
AT1G68810	5.501	-1.653	0
AT1G61890	4.346	3.318	0
AT3G04070	1.088	3.29	0.001
AT1G69526	0.772	-1.602	0.03
AT1G69530	5.535	-1.2	0
AT3G56400	6	3.281	0
AT1G66090	1.754	3.277	0
AT1G78410	1.343	3.269	0
AT2G30020	4.18	3.265	0
AT2G36890	0.606	3.263	0.003
AT3G60540	0.412	3.26	0.037
AT3G08000	0.295	3.257	0.01
AT1G70360	3.016	-1.815	0.002
AT1G64380	0.161	3.239	0.003
AT5G19240	4.418	3.239	0
AT2G41640	2.973	3.237	0
AT1G71015	1.547	-1.619	0.009
AT1G54000	-0.509	3.23	0.044
AT1G71380	3.85	-1.792	0
AT5G01100	2.392	3.223	0
AT2G17880	0.887	3.219	0
AT1G72910	4.962	3.202	0
AT1G09932	0.714	3.191	0.012
AT4G08770	2.96	3.179	0.017
AT1G73540	5.003	3.176	0
AT4G15150	2.099	3.166	0
AT5G03310	1.001	3.159	0.006
AT5G49520	2.439	3.156	0
AT4G25110	0.077	3.146	0.012
AT1G72920	3.878	3.108	0
AT1G25560	4.533	3.099	0
AT1G72520	3.989	3.098	0
AT1G10340	2.982	3.096	0
AT2G38470	5.369	3.095	0
AT1G73590	5.648	-1.028	0
AT3G57760	0.806	3.087	0.001
AT2G05440	4.956	3.079	0.001
AT1G52890	3.027	3.076	0
AT5G05300	2.068	3.074	0
AT1G74890	2.632	-1.129	0.009
AT4G10500	2.385	3.063	0
AT5G03210	2.167	3.05	0
AT1G75500	9.366	-1.031	0.001
AT1G75720	2.311	-1.449	0.003
AT5G39670	4.643	3.044	0
AT1G14480	1.798	3.004	0
AT1G66465	0.355	2.989	0.025
AT4G20835	5.523	2.987	0
AT1G02610	3.294	2.97	0
AT1G76610	1.383	-1.24	0.027
AT2G32210	0.465	2.967	0.05
AT5G52750	4.625	2.963	0
AT1G67110	0.14	2.959	0.006
AT1G77855	2.191	-1.301	0.006
AT1G78030	1.025	-1.564	0.031
AT1G78100	4.626	-1.237	0
AT1G20310	0.602	2.941	0.029
AT1G78730	1.809	-1.8	0.001
AT1G18740	4.789	2.938	0
AT1G20520	0.717	2.938	0.019
AT2G39650	2.819	2.926	0
AT2G24850	3.699	2.923	0
AT1G66180	4.081	2.921	0
AT5G20230	5.108	2.92	0
AT5G22530	0.189	2.903	0.031
AT1G23205	-0.155	2.898	0.042
AT1G80880	0.803	-1.604	0.018
AT2G01008	2.435	-1.478	0.001
AT2G01021	20.344	-1.756	0.018
AT4G17500	6.3	2.893	0
AT4G31875	0.7	2.891	0.007
AT2G01200	0.981	-1.458	0.049
AT5G44430	2.629	2.889	0.018
AT2G01610	6.427	-1.396	0
AT3G22060	2.879	2.878	0.001
AT2G01760	2.277	-1.151	0.016
AT4G11310	0.88	2.878	0.012
AT3G44860	2.738	2.87	0
AT1G32920	5.661	2.861	0
AT1G35210	2.091	2.856	0.001
AT5G22250	4.445	2.84	0
AT2G03090	6.995	-1.179	0
AT1G80820	2.348	2.832	0
AT1G65845	2.559	2.828	0
AT4G14365	4.361	2.828	0
AT1G51800	-0.558	2.824	0.029
AT2G07623	-3.07	-6.126	0
AT2G07641	1.952	-1.128	0.04
AT1G57990	3.366	2.819	0
AT5G52760	3.171	2.808	0
AT2G10940	3.663	-1.592	0.005
AT2G13275	1.392	-2.39	0.037
AT2G13820	4.949	-1.754	0
AT2G13960	1.77	-1.209	0.02
AT4G01870	4.777	2.803	0.001
AT3G17790	1.638	2.8	0.01
AT2G14825	3.464	-1.095	0.006
AT2G14860	1.84	-1.588	0.005
AT2G15020	4.192	-1.246	0
AT1G65510	3.516	2.788	0
AT5G37770	5.634	2.788	0
AT4G31354	0.489	2.785	0.03
AT3G22600	0.49	2.781	0.01
AT3G57260	7.424	2.778	0
AT3G57450	4.529	2.775	0
AT1G72070	2.839	2.756	0
AT2G07739	0.281	2.753	0.014
AT2G16580	0.455	-2.489	0.002
AT2G15390	3.352	2.743	0
AT5G62020	1.682	2.739	0
AT2G44578	1.569	2.723	0.012
AT2G41105	3.906	2.722	0
AT3G12220	0.516	2.72	0.013
AT5G22580	2.027	2.718	0
AT3G48640	1.111	2.716	0.018
AT2G35710	-0.028	2.712	0.017
AT5G54490	2.816	2.71	0.001
AT1G56660	4.412	2.703	0
AT1G62760	1.589	2.7	0.011
AT5G65390	0.451	2.692	0.024
AT3G13950	2.012	2.684	0
AT2G21050	5.583	-2.009	0
AT2G22122	5.502	-1.091	0.001
AT4G23610	3.266	2.682	0
AT5G25440	2.85	2.682	0
AT5G42235	1.314	2.68	0.037
AT2G36080	1.366	2.672	0.001
AT3G16860	2.545	2.671	0
AT2G23210	1.702	-1.22	0.019
AT4G33420	1.679	2.671	0.01
AT2G26190	4.462	2.664	0
AT5G24090	2.291	2.664	0.029
AT1G66960	-0.451	2.663	0.028
AT4G30430	0.06	2.655	0.031
AT1G72940	3.375	2.647	0
AT2G24700	1.122	-1.104	0.035
AT3G49780	4.666	2.647	0
AT1G25400	3.622	2.636	0
AT1G72900	5.647	2.629	0
AT2G32030	2.648	2.627	0
AT2G01180	3.821	2.622	0
AT5G07080	0.513	2.615	0.002
AT4G37260	5.148	2.614	0
AT4G20830	4.946	2.613	0
AT2G35930	1.762	2.598	0.004
AT1G19180	6.03	2.597	0
AT2G26710	0.697	-2.542	0
AT2G17040	5.017	2.593	0
AT2G18690	3.023	2.588	0
AT2G27480	1.817	-1.491	0.004
AT5G03350	2.895	2.581	0.003
AT1G09950	0.622	2.577	0.015
AT4G01250	2.642	2.571	0
AT3G10040	0.1	2.57	0.039
AT4G01700	5.419	2.57	0
AT3G52400	5.69	2.568	0
AT5G63090	0.348	2.556	0.021
AT1G17420	3.296	2.554	0
AT2G16060	3.214	2.554	0.048
AT5G22545	1.252	2.529	0.001
AT2G28690	1.906	-2.077	0
AT2G28755	-3.07	-6.019	0
AT3G50260	2.623	2.527	0
AT2G29125	2.1	-1.201	0.04
AT4G22710	2.354	2.521	0
AT5G01900	1.762	2.517	0.013
AT1G75770	0.55	2.505	0.035
AT2G30010	3.614	-1.023	0.006
AT2G41100	6.895	2.503	0
AT5G56550	5.019	2.5	0
AT3G28220	4.256	2.497	0
AT3G56880	5.364	2.492	0
AT1G24147	2.813	2.479	0
AT3G16510	3.239	2.478	0
AT2G31380	5.276	-1.182	0
AT5G39190	2.265	2.467	0.007
AT3G23240	2.348	2.464	0.005
AT2G31940	2.028	-1.445	0.013
AT3G45960	3.708	2.46	0
AT5G06320	7.279	2.444	0
AT3G45970	4.247	2.441	0
AT1G59590	3.411	2.44	0
AT2G24600	3.405	2.44	0
AT2G32430	3.016	-1.055	0.004
AT2G22860	5.031	2.433	0.001
AT1G56150	2.083	2.432	0.001
AT2G26560	2.988	2.432	0
AT2G34060	1.597	-1.411	0.012
AT4G38560	1.965	2.423	0
AT5G36001	0.77	2.417	0.003
AT5G04340	5.252	2.393	0
AT2G34925	1.838	-1.81	0.004
AT5G28630	1.419	2.389	0.001
AT4G27410	3.34	2.384	0
AT2G35700	2.662	-1.624	0
AT5G26920	4.258	2.381	0
AT3G50770	3.48	2.378	0
AT5G13330	2.966	2.369	0
AT3G15450	8.673	2.367	0
AT5G62470	1.648	2.353	0.001
AT2G36145	4.417	-1.051	0
AT1G18200	0.313	2.345	0.048
AT5G44568	2.677	2.345	0
AT3G57460	0.852	2.337	0.019
AT1G61340	4.09	2.326	0
AT3G51440	1.557	2.321	0
AT2G01300	4.241	2.316	0.002
AT2G37530	3.087	-1.102	0.003
AT3G16460	0.271	2.313	0.042
AT2G37925	1.406	-2.088	0.002
AT5G10760	4.221	2.306	0
AT3G07195	1.987	2.297	0.008
AT2G38530	1.573	-1.133	0.042
AT2G38540	4.501	-2.792	0
AT5G60800	1.762	2.292	0.003
AT2G38810	3.253	-1.729	0
AT1G35230	3.322	2.283	0
AT1G48000	1.625	2.274	0.028
AT3G14440	1.481	2.262	0.001
AT1G73325	1.168	2.257	0.041
AT4G08870	4.557	2.256	0
AT5G05530	1.01	2.251	0.03
AT1G11670	1.225	2.244	0.003
AT2G28210	1.01	2.244	0.01
AT2G40130	4.827	-1.133	0
AT3G46600	5.772	2.239	0
AT2G40230	2.884	-1.518	0
AT5G41740	3.2	2.239	0
AT5G44572	2	2.239	0.012
AT3G50470	0.972	2.22	0.015
AT2G39200	0.494	2.219	0.049
AT2G41342	2.487	-1.839	0
AT5G65730	2.037	2.216	0.004
AT2G23810	6.859	2.215	0
AT2G41820	4.379	-1.314	0
AT1G70090	3.301	2.21	0
AT5G19230	2.546	2.201	0
AT3G62260	4.37	2.198	0
AT3G20600	2.905	2.196	0
AT2G43580	2.194	-1.448	0.009
AT3G25882	3.121	2.194	0
AT5G26690	3.436	2.191	0
AT2G35658	1.371	2.182	0.026
AT3G16720	4.639	2.172	0
AT2G35290	2.11	2.168	0.012
AT4G23180	5.025	2.167	0
AT4G31405	1.163	2.165	0.024
AT2G44940	3.66	-1.719	0
AT2G44990	2.169	-2.681	0
AT2G45080	0.87	-2.981	0
AT2G45600	2.332	-1.191	0.011
AT2G15042	4.065	2.156	0
AT3G62720	3.703	2.156	0
AT2G38790	4.264	2.154	0
AT5G18470	4.985	2.152	0
AT1G17380	5.265	2.148	0
AT5G47070	3.959	2.142	0
AT2G47885	0.491	-3.399	0.003
AT1G77145	1.794	2.139	0.01
AT5G08240	2	2.134	0
AT3G01080	1.068	2.132	0.012
AT3G01345	1.509	-10.291	0
AT5G54610	3.625	2.132	0
AT3G02160	1.438	-1.569	0.008
AT3G02493	3.654	-1.778	0
AT3G26830	2.106	2.128	0.006
AT3G51910	1.514	2.127	0.003
AT3G23110	0.818	2.124	0.027
AT3G02885	3.526	-1.537	0
AT5G10695	6.124	2.124	0
AT1G72720	0.802	2.111	0.028
AT2G32680	1.832	2.11	0.004
AT3G04630	3.755	-1.09	0
AT3G01290	5.484	2.108	0
AT2G14560	6.952	2.103	0
AT3G06145	3.026	-1.278	0
AT3G06370	3.831	-1.034	0
AT4G12480	5.113	2.101	0.006
AT3G06895	-3.07	-8.914	0
AT2G33580	3.409	2.094	0
AT2G43620	3.14	2.092	0.024
AT1G80440	6.981	2.088	0
AT3G08030	5.964	-1.047	0
AT2G20142	3.194	2.087	0
AT1G06520	2.678	2.084	0
AT3G25855	1.522	2.08	0.02
AT3G09032	0.62	-1.815	0.035
AT2G44080	3.309	2.073	0.004
AT5G49450	5.211	2.066	0
AT5G56870	5.061	2.063	0
AT2G26530	3.691	2.062	0
AT3G10520	2.946	-1.369	0.002
AT5G58680	2.713	2.062	0.003
AT2G31880	5.99	2.061	0
AT5G14470	1.376	2.056	0.005
AT4G35180	0.964	2.047	0.023
AT3G06070	3.817	2.046	0
AT2G25735	2.513	2.044	0.002
AT5G50450	3.597	2.044	0
AT4G25390	2.665	2.042	0
AT5G25250	3.666	2.04	0
AT5G19120	6.618	2.037	0
AT3G13857	1.597	-5.362	0
AT1G66500	2.985	2.036	0.002
AT3G14210	3.106	-2.695	0
AT4G02380	7.752	2.035	0.001
AT3G44300	6.753	2.031	0
AT5G48657	3.022	2.018	0
AT1G70290	5.772	2.007	0
AT4G35770	3.602	2.007	0.003
AT4G33050	5.571	2.005	0
AT3G15540	4.842	-1.96	0
AT5G46080	2.106	1.998	0.001
AT3G60415	2.599	1.996	0.001
AT2G26010	4.519	1.989	0.001
AT5G60650	1.944	1.984	0.008
AT5G26170	1.856	1.977	0.001
AT5G58120	3.426	1.974	0
AT5G20250	5.145	1.973	0
AT3G16712	-3.07	-8.04	0
AT1G80130	1.743	1.968	0.031
AT5G67300	5.506	1.968	0
AT1G18570	5.114	1.966	0
AT2G40140	5.801	1.966	0
AT1G80450	2.758	1.961	0
AT1G69890	4.622	1.955	0
AT5G62380	1.096	1.952	0.011
AT3G18715	1.027	-1.516	0.048
AT5G56980	3.828	1.95	0
AT3G18880	1.32	-1.807	0.009
AT3G19270	0.796	-1.67	0.03
AT1G63720	2.965	1.946	0
AT1G67856	1.607	1.946	0.014
AT5G45110	4.194	1.944	0
AT1G32170	3.305	1.941	0
AT4G24380	5.078	1.941	0
AT4G21390	1.019	1.94	0.016
AT3G28917	2.368	1.93	0.002
AT1G58225	2.723	1.923	0
AT3G28540	4.104	1.918	0
AT5G22520	2.462	1.918	0
AT4G09030	3.348	1.914	0
AT5G59550	5.343	1.914	0
AT4G02075	3.937	1.913	0
AT1G23840	3.907	1.91	0
AT1G09070	7.144	1.9	0
AT3G23637	-3.07	-9.308	0
AT3G23930	1.445	-1.972	0.001
AT2G05940	4.801	1.897	0
AT1G11785	2.149	1.896	0.001
AT3G49790	4.047	1.892	0
AT4G23190	1.346	1.888	0.008
AT5G44820	2.164	1.887	0
AT3G25717	7.541	-1.273	0
AT1G05310	1.211	1.886	0.023
AT5G47220	5.893	1.867	0
AT2G39030	6.176	1.866	0
AT4G35480	4.51	1.866	0
AT5G01540	2.097	1.85	0.001
AT3G26210	3.238	1.847	0
AT5G66210	4.856	1.841	0
AT3G26290	3.763	-1.08	0
AT5G24420	4.527	1.832	0.005
AT1G66810	2.001	1.831	0.002
AT5G58360	2.235	1.831	0.003
AT3G26960	5.063	-1.2	0
AT3G27400	3.918	-1.254	0
AT2G28630	4.205	1.83	0
AT3G28200	4.856	-1.182	0
AT1G65490	5.874	1.828	0
AT3G49320	1.964	1.827	0.002
AT3G28420	3.206	-2.776	0
AT4G34150	6.341	1.817	0
AT1G54575	4.224	1.813	0
AT3G19680	3.099	1.811	0
AT5G21940	6.635	1.811	0
AT5G13320	1.49	1.809	0.01
AT3G55950	1.247	1.806	0.015
AT4G31800	5.577	1.801	0
AT5G56985	5.426	1.799	0
AT4G11000	0.946	1.795	0.031
AT3G42725	1.331	-1.899	0.023
AT1G73500	5.91	1.793	0
AT1G64065	1.607	1.791	0.01
AT2G34650	0.722	1.791	0.05
AT3G44450	3.306	-1.779	0
AT2G24550	7.34	1.79	0
AT3G44990	5.072	-1.115	0
AT2G44790	3.213	1.79	0
AT3G45210	4.669	-1.012	0
AT3G45230	3.617	-1.134	0
AT3G59700	1.66	1.787	0.01
AT2G22470	1.637	1.785	0.037
AT1G13470	2.403	1.778	0
AT1G15670	4.002	1.774	0
AT3G12830	2.355	1.772	0.014
AT5G67340	1.981	1.77	0.001
AT3G46880	2.813	-1.74	0.003
AT3G47100	3.095	-1.012	0.017
AT5G05190	2.301	1.769	0.001
AT3G59080	1.952	1.767	0.001
AT5G05410	3.604	1.765	0
AT5G61440	2.383	1.764	0.002
AT5G61660	3.684	1.762	0
AT3G46620	4.25	1.76	0.015
AT2G29350	5.679	1.752	0
AT2G28660	3.82	1.75	0.001
AT1G25550	4.484	1.749	0
AT1G62300	2.848	1.741	0
AT3G18690	4.07	1.74	0.001
AT1G66880	4.145	1.737	0
AT2G30750	2.006	1.736	0.036
AT5G55050	2.1	1.736	0.002
AT3G50450	2.741	-1.239	0.048
AT2G30360	3.824	1.734	0
AT3G02800	3.219	1.734	0
AT2G43570	4.514	1.733	0
AT3G28180	4.514	1.728	0
AT1G02450	2.846	1.727	0.044
AT1G02660	2.216	1.727	0.002
AT1G05575	3.628	1.725	0
AT1G08630	2.576	1.724	0.023
AT1G32640	6.747	1.723	0
AT2G43930	1.808	1.72	0.005
AT3G23010	1.184	1.719	0.036
AT4G02520	9.135	1.713	0
AT4G09035	5.52	1.709	0
AT3G52905	3.497	-1.228	0
AT3G53450	1.401	-1.629	0.036
AT3G15630	5.966	1.707	0
AT5G35735	6.473	1.701	0
AT1G09995	2.037	1.699	0.003
AT3G48080	2.195	1.695	0.002
AT3G07350	3.41	1.694	0
AT1G20823	5.77	1.673	0
AT5G44350	2.879	1.672	0.02
AT5G24210	3.877	1.67	0
AT5G60950	1.68	1.669	0.042
AT1G03730	3.214	1.659	0
AT3G56770	1.999	-1.103	0.016
AT4G15800	2.444	1.656	0.009
AT3G57010	2.522	-1.877	0
AT4G34138	3.46	1.656	0
AT1G72930	7.022	1.655	0
AT4G28085	4.556	1.645	0
AT4G08950	1.835	1.64	0.028
AT1G64660	3.522	1.639	0
AT4G39640	3.279	1.637	0
AT3G50760	1.798	1.634	0.018
AT1G69490	3.923	1.632	0.014
AT3G58850	2.67	-1.267	0.018
AT4G27480	2.371	1.632	0.002
AT1G22190	5.751	1.631	0
AT3G26512	5.752	1.631	0
AT5G53110	2.797	1.621	0
AT1G13750	2.086	1.619	0.002
AT3G49530	5.197	1.619	0
AT3G10020	8.516	1.611	0
AT3G28890	1.77	1.609	0.005
AT4G18340	2.778	1.603	0.001
AT1G66590	3.595	1.602	0
AT5G57220	2.292	1.601	0.024
AT3G62060	1.708	-1.168	0.01
AT3G62100	2.426	-1.266	0.007
AT3G62110	4.193	-1.143	0
AT1G52855	2.192	1.599	0
AT3G62695	5.878	-2.523	0.008
AT5G54380	2.413	1.598	0.001
AT4G37010	2.258	1.587	0.017
AT3G63360	2.409	-1.897	0.005
AT3G63440	4.699	-1.102	0
AT5G64660	3.326	1.583	0.004
AT1G54890	1.342	1.58	0.024
AT2G47730	6.319	1.573	0
AT4G01680	4.223	-1.155	0
AT3G50480	6.635	1.573	0
AT1G23390	6.373	1.572	0
AT1G53840	4.113	1.572	0
AT3G59940	5.659	1.571	0
AT5G25930	3.022	1.571	0
AT4G02290	3.485	-1.092	0
AT2G44500	4.68	1.567	0
AT4G23220	1.961	1.567	0.005
AT4G02482	2.415	-1.277	0.029
AT5G08760	5.827	1.567	0
AT4G02800	0.995	-1.35	0.046
AT3G08720	4.524	1.566	0
AT2G25900	6.351	1.565	0
AT2G34430	7.294	1.561	0.045
AT5G37540	3.728	1.56	0
AT5G42530	10.356	1.56	0
AT1G15380	3.761	1.559	0.024
AT4G39890	3.089	1.559	0.002
AT4G27460	3.017	1.558	0
AT2G46510	4.732	1.556	0
AT4G09490	3.779	-1.323	0
AT4G09500	2.865	-1.249	0.001
AT4G09965	1.52	-1.372	0.027
AT2G48010	3.277	1.553	0.001
AT1G13260	6.644	1.546	0
AT2G02710	5.686	1.544	0
AT1G27770	4.905	1.543	0
AT5G24530	4.793	1.54	0
AT2G30550	4.881	1.536	0
AT4G39780	4.589	1.531	0
AT3G02550	5.446	1.53	0.014
AT1G23050	6.33	1.529	0
AT4G12450	2.556	-1.11	0.009
AT2G28200	5.003	1.528	0
AT3G52430	3.225	1.528	0
AT1G35710	4.899	1.527	0
AT1G51700	4.833	1.527	0
AT4G13990	2.135	-1.245	0.013
AT4G14103	1.787	-1.34	0.017
AT2G41010	5.293	1.525	0
AT2G47130	4.379	1.523	0
AT3G56710	6.086	1.523	0
AT5G49360	6.744	1.522	0.003
AT5G65207	5.791	1.518	0.001
AT4G15830	1.606	-2.182	0
AT4G12720	5.842	1.517	0
AT2G27500	5.264	1.514	0
AT5G13200	4.996	1.513	0
AT1G19770	7.556	1.51	0
AT5G15120	3.359	1.502	0.032
AT3G54150	2.321	1.501	0.013
AT1G73805	2.876	1.5	0.002
AT2G33060	3.346	1.5	0
AT1G76930	5.421	1.497	0.012
AT2G18700	3.837	1.495	0
AT4G19975	1.101	-2.981	0
AT2G29120	2.217	1.493	0.002
AT5G56100	2.315	1.491	0.042
AT1G03870	3.091	1.49	0.004
AT1G30250	4.115	1.489	0.001
AT1G27100	5.231	1.482	0
AT1G67980	2.37	1.482	0.023
AT5G45490	3.616	1.476	0.009
AT2G43510	6.727	1.475	0.009
AT2G39210	4.335	1.472	0
AT2G16385	2.84	1.47	0.005
AT4G22010	1.892	-1.284	0.01
AT4G23870	3.277	1.47	0
AT4G22370	1.175	-1.737	0.014
AT5G64260	6.164	1.469	0
AT2G25510	10.13	1.466	0
AT3G24520	2.597	1.466	0.001
AT4G22950	1.454	-1.524	0.021
AT4G27450	7.183	1.464	0.002
AT3G25600	3.188	1.458	0.012
AT3G57640	1.617	1.455	0.031
AT3G30720	3.406	1.454	0.048
AT3G47340	2.63	1.454	0.003
AT1G15125	7.699	1.449	0.003
AT3G09020	4.08	1.447	0
AT3G04210	5.004	1.446	0
AT1G10140	6.181	1.444	0
AT4G13340	3.544	1.441	0.002
AT5G06860	4.22	1.441	0.002
AT4G24615	2.621	-3.789	0
AT4G24780	7.56	-1.297	0
AT4G22305	2.872	1.44	0.001
AT1G65690	2.003	1.436	0.021
AT1G08050	1.761	1.434	0.011
AT4G25410	0.701	-1.705	0.017
AT4G25420	3.435	-1.847	0
AT1G69790	2.766	1.432	0
AT1G75040	6.484	1.428	0
AT2G14210	4.684	1.426	0.01
AT3G12145	4.658	1.426	0
AT5G55450	2.59	1.426	0.005
AT3G13080	4.482	1.425	0
AT4G11660	2.96	1.424	0.001
AT3G23120	2.479	1.422	0.005
AT1G48605	2.098	1.421	0.011
AT3G16360	3.297	1.421	0.001
AT5G44420	5.466	1.417	0.025
AT4G27950	1.544	-1.92	0.001
AT1G31580	9.552	1.415	0
AT2G43290	6.363	1.415	0
AT4G28240	6.657	-1.07	0
AT4G28250	6.412	-1.546	0
AT4G28310	1.245	-1.691	0.005
AT4G28640	4.413	-1.196	0
AT4G29360	1.939	-1.343	0.012
AT3G45640	6.992	1.413	0
AT4G30410	2.488	-1.143	0.014
AT3G57530	5.997	1.412	0
AT3G22231	6.427	1.408	0.023
AT4G30830	2.328	-1.263	0.008
AT1G72430	5.425	1.407	0
AT2G24240	3.322	1.406	0.001
AT3G18250	3.609	1.405	0.047
AT5G38900	3.236	1.404	0.002
AT4G14400	4.967	1.4	0
AT5G55460	3.379	1.4	0.001
AT4G21700	1.431	1.399	0.043
AT4G32810	4.485	-2.111	0
AT2G01670	4.441	1.396	0.004
AT4G33130	0.717	-1.437	0.042
AT1G33102	3.367	1.395	0.002
AT1G74440	3.55	1.39	0
AT4G33960	3.568	-1.174	0.004
AT5G62770	5.238	1.389	0
AT4G30450	5.118	1.388	0.007
AT1G67970	3.444	1.384	0
AT5G59450	4.532	1.384	0
AT2G15890	7.698	1.379	0
AT3G55430	5.174	1.366	0
AT4G34810	0.715	-2.691	0.007
AT4G35030	3.091	-1.086	0.007
AT1G12990	2.866	1.363	0
AT1G76410	5.85	1.359	0
AT5G25755	2.139	1.358	0.048
AT4G04960	3.818	1.356	0
AT4G18880	4.102	1.356	0
AT1G11960	2.939	1.354	0.002
AT3G15760	3.626	1.354	0.001
AT3G18560	4.186	1.354	0
AT5G35480	5.066	1.354	0.002
AT4G37095	-3.07	-14.768	0
AT1G14700	1.565	1.353	0.021
AT1G61795	2.184	1.353	0.042
AT3G55970	4.159	1.353	0
AT3G26220	3.205	1.352	0.002
AT3G45140	5.512	1.347	0.014
AT4G38210	2.327	-1.583	0.001
AT5G47240	4.78	1.344	0
AT4G38660	3.913	-1.202	0
AT4G38840	3.043	-1.605	0.001
AT4G39330	4.616	-1.045	0
AT1G21240	2.879	1.339	0.005
AT1G64700	2.351	1.337	0.037
AT5G40230	1.468	1.332	0.043
AT4G17230	5.331	1.331	0
AT3G50950	5.933	1.33	0
AT4G40063	3.859	-2.678	0.043
AT5G01070	0.622	-1.886	0.037
AT4G11300	3.604	1.33	0
AT3G23170	4.147	1.327	0.001
AT1G06160	4.957	1.326	0.022
AT1G64060	2.174	1.323	0.005
AT5G51390	3.064	1.322	0.011
AT5G01790	1.861	-1.312	0.017
AT5G01840	3.821	-1.279	0
AT2G23120	5.62	1.32	0
AT1G16260	3.541	1.319	0
AT5G02420	2.231	-1.507	0.012
AT5G26030	5.379	1.318	0
AT1G69720	2.586	1.316	0.002
AT4G26690	3.823	1.314	0
AT1G54740	3.391	1.312	0.004
AT2G32150	6.359	1.311	0
AT5G22270	2.111	1.309	0.025
AT4G24000	2.839	1.304	0.001
AT5G64900	3.991	1.304	0.024
AT1G05340	4.443	1.3	0
AT5G13220	4.925	1.295	0
AT1G59910	3.532	1.287	0.001
AT4G21380	2.605	1.287	0.001
AT2G36800	2.989	1.286	0.005
AT5G05860	2.612	-1.061	0.024
AT1G72260	3.25	1.285	0.017
AT1G03470	2.116	1.284	0.022
AT1G61820	4.552	1.284	0
AT1G68725	4.701	1.284	0.033
AT5G07030	2.909	-1.619	0
AT4G17245	3.81	1.283	0.004
AT5G07620	1.514	-1.37	0.023
AT5G07680	1.56	-1.403	0.007
AT1G23870	3.207	1.282	0.001
AT3G48020	2.166	1.28	0.042
AT1G70690	5.094	1.279	0
AT3G29575	2.541	1.278	0.032
AT5G39050	2.072	1.277	0.012
AT2G37970	5.924	1.276	0
AT4G09460	2.764	1.276	0.004
AT5G14930	3.334	1.274	0
AT2G19710	2.953	1.273	0.005
AT5G12235	1.602	-1.72	0.046
AT3G15356	5.249	1.271	0.02
AT5G45095	1.917	1.27	0.044
AT3G08040	2.365	1.266	0.002
AT3G11650	3.816	1.266	0
AT5G16370	4.588	1.262	0
AT3G21780	3.416	1.261	0.001
AT5G13400	1.366	-1.691	0.002
AT1G07520	3.102	1.26	0
AT5G14450	2.281	-1.078	0.016
AT3G06435	2.022	1.259	0.026
AT5G64310	6.075	1.256	0.005
AT1G65790	2.437	1.255	0.018
AT3G16400	5.581	1.255	0
AT2G29460	4.921	1.254	0
AT5G15950	6.01	-4.344	0
AT5G66070	4.782	1.254	0.002
AT5G17180	2.622	-2.128	0.01
AT5G24570	3.46	1.253	0.03
AT4G21120	2.934	1.248	0.009
AT2G02450	2.29	1.247	0.013
AT5G18661	1.153	-2.753	0.003
AT5G18930	2.653	-1.163	0.003
AT5G42050	8.016	1.246	0
AT2G16430	3.787	1.245	0
AT1G49320	5.399	1.241	0
AT5G19530	6.457	-1.248	0
AT4G33920	5.102	1.236	0
AT4G21920	3.246	1.235	0.003
AT3G09455	2.755	1.234	0.042
AT5G20670	3.631	-2.279	0
AT5G20820	4.05	-1.68	0
AT5G20935	3.44	-1.521	0
AT1G01140	4.122	1.233	0
AT1G04280	1.799	1.23	0.042
AT3G22160	4.485	1.229	0
AT1G21130	5.798	1.228	0
AT4G35110	4.064	1.228	0
AT1G29690	3.338	1.225	0.001
AT1G70335	5.95	1.223	0
AT2G42760	4.771	1.222	0.005
AT2G36470	2.147	1.218	0.025
AT2G39400	4.581	1.218	0
AT5G22930	3.693	-1.654	0
AT5G23411	10.304	-2.253	0.025
AT2G01850	6.008	1.217	0
AT5G08790	6.269	1.216	0.001
AT5G57520	4.448	1.216	0.005
AT5G24320	3.573	-1.04	0
AT5G14120	5.912	1.214	0
AT3G61280	4.802	1.213	0
AT1G09460	2.403	1.211	0.008
AT5G02020	4.571	1.211	0.015
AT5G24920	5.173	-1.329	0
AT5G05460	3.112	1.211	0.001
AT4G37180	4.878	1.209	0
AT5G13190	4.921	1.208	0
AT5G25840	3.253	-1.037	0.037
AT2G28570	2.937	1.206	0.005
AT1G11050	4.881	1.205	0
AT3G53810	3.558	1.204	0.001
AT5G59990	2.458	1.203	0.023
AT5G26890	2.272	-3.116	0
AT1G32700	6.632	1.201	0
AT5G27247	-3.07	-10.891	0
AT1G61610	2.452	1.194	0.005
AT2G29995	2.828	1.193	0.008
AT2G02930	4.94	1.19	0.009
AT1G07780	2.307	1.188	0.03
AT4G31270	2.703	1.186	0.005
AT5G55930	3.331	1.186	0.001
AT5G53550	2.886	1.185	0.002
AT2G46330	5.952	1.184	0.001
AT3G53960	5.43	1.181	0
AT5G40780	4.286	1.18	0
AT5G14700	4.028	1.178	0.002
AT3G25010	2.318	1.175	0.021
AT2G17230	3.582	1.174	0.001
AT3G52390	1.91	1.173	0.045
AT3G61640	4.466	1.172	0.005
AT1G07000	3.833	1.171	0
AT2G23680	3.162	1.162	0.008
AT4G33985	4.256	1.162	0.002
AT2G16900	4.478	1.156	0
AT2G37750	4.31	1.156	0
AT4G03110	3.297	1.152	0.001
AT5G42630	1.516	-1.332	0.024
AT5G06870	5.782	1.152	0
AT1G72450	7.362	1.151	0
AT5G43050	2.577	-1.288	0.008
AT5G43250	1.044	-1.631	0.046
AT1G18710	2.455	1.15	0.015
AT4G36040	7.501	1.149	0
AT5G54170	5.241	1.144	0
AT2G31865	3.229	1.142	0.001
AT5G41100	2.795	1.141	0.005
AT1G63855	2.484	1.14	0.028
AT5G60900	2.66	1.138	0.009
AT1G02930	6.63	1.136	0.013
AT5G02502	4.65	1.136	0.007
AT1G80170	7.228	1.134	0.001
AT4G19420	7.463	1.131	0
AT2G27775	3.463	1.129	0.009
AT1G22890	5.171	1.126	0.001
AT1G21310	8.696	1.121	0.001
AT1G30810	3.728	1.121	0
AT5G10750	3.95	1.12	0.004
AT1G19960	5.622	1.119	0.002
AT2G30040	3.18	1.119	0.043
AT4G01026	4.046	1.118	0.005
AT1G76590	6.766	1.117	0.007
AT5G18150	4.632	1.116	0.003
AT5G47370	5.448	-1.078	0
AT3G30775	3.774	1.113	0.021
AT3G57520	6.118	1.113	0
AT1G12240	7.155	1.11	0
AT3G52800	7.531	1.11	0.001
AT1G74020	3.009	1.109	0.033
AT5G64800	3.359	1.109	0.003
AT5G50090	2.42	-1.008	0.034
AT1G06620	5.14	1.108	0
AT1G64760	2.715	1.107	0.008
AT4G02360	3.509	1.102	0.017
AT5G54530	4.116	1.102	0.017
AT1G65486	5.785	1.097	0.005
AT3G54000	2.753	1.097	0.01
AT4G35600	4.366	1.097	0
AT4G24972	3.984	1.096	0.016
AT1G55450	5.335	1.093	0
AT1G21250	6.119	1.091	0
AT1G31130	6.309	1.088	0
AT5G54060	1.392	-1.356	0.023
AT3G26230	3.732	1.086	0.001
AT5G54300	1.888	-1.323	0.01
AT3G28840	2.403	1.085	0.022
AT5G43420	3.939	1.085	0.003
AT2G18670	3.661	1.082	0.001
AT5G42650	6.253	1.082	0.001
AT5G55010	2.402	-1.388	0.008
AT1G21313	9.577	1.075	0.001
AT5G47910	6.075	1.075	0
AT1G11260	6.335	1.069	0.001
AT3G11820	5.378	1.068	0
AT1G71030	3.157	1.067	0.004
AT5G56120	1.577	-1.229	0.044
AT2G36220	5.295	1.067	0.022
AT2G26440	3.896	1.065	0
AT4G17250	3.638	1.064	0.001
AT1G70740	3.38	1.063	0.004
AT5G57000	2.654	-1.024	0.013
AT1G49310	5.009	1.062	0.007
AT4G22755	3.107	1.059	0.011
AT5G65870	5.334	1.055	0.021
AT5G05600	6.497	1.052	0.002
AT1G32540	2.78	1.05	0.011
AT1G78830	6.969	1.048	0
AT3G11010	3.326	1.048	0.006
AT5G57890	2.422	1.046	0.033
AT5G59305	7.105	-1.133	0
AT4G15760	4.97	1.044	0
AT3G18660	5.26	1.043	0.008
AT4G18010	3.43	1.043	0.008
AT1G63840	3.347	1.041	0.004
AT5G60215	-3.07	-7.614	0
AT5G24590	5.021	1.04	0.002
AT4G09990	2.705	1.039	0.023
AT1G13245	5.083	1.038	0.001
AT1G23100	3.385	1.038	0.012
AT5G67480	5.171	1.036	0.026
AT3G25570	2.823	1.035	0.016
AT5G01610	4.884	1.035	0.001
AT5G61750	1.466	-1.616	0.017
AT1G20450	7.318	1.034	0
AT5G62350	6.7	-1.042	0
AT2G27830	5.894	1.034	0
AT1G03850	2.4	1.033	0.039
AT4G34710	5.108	1.033	0
AT3G03020	4.244	1.03	0.004
AT5G62920	3.482	-1.721	0
AT5G57710	4.835	1.028	0
AT5G63375	2.653	-2.104	0.01
AT5G63690	2.377	-1.091	0.012
AT1G34750	4.578	1.025	0.001
AT5G65380	2.802	1.024	0.014
AT1G13700	5.428	1.022	0.001
AT1G14200	4.723	1.022	0
AT1G70420	3.152	1.022	0.016
AT5G01600	6.876	1.022	0.027
AT2G39360	2.221	1.02	0.032
AT5G64770	4.916	-1.623	0
AT2G41110	5.341	1.02	0.004
AT3G13750	7.323	1.02	0.006
AT1G04900	2.813	1.019	0.007
AT1G73480	3.629	1.019	0.012
AT5G65040	6.294	-1.076	0
AT4G22780	4.803	1.018	0
AT5G46710	3.11	1.017	0.019
AT4G02200	4.112	1.015	0.006
AT2G27310	5.491	1.014	0
AT4G11360	6.237	1.012	0.006
AT1G10155	3.911	1.011	0
AT5G65925	2.043	-1.102	0.022
AT5G66053	12.378	-1.987	0
AT3G62860	2.815	1.011	0.039
AT3G57240	2.987	1.007	0.017
AT4G18440	5.381	1.007	0.001
AT4G37370	3.208	1.007	0.019
AT2G19570	5.809	1.006	0
AT2G30250	4.125	1.005	0
AT1G36060	2.973	1.001	0.016
ATCG00020	6.846	-1.994	0
ATCG00280	4.103	-1.647	0
ATCG00300	-3.07	-6.946	0
ATCG00340	3.302	-1.517	0
ATCG00350	2.991	-1.114	0.017
ATCG00360	1.049	-5.617	0
ATCG00490	5.159	-1.53	0
ATCG00550	9.823	-4.562	0.009
AT2G41410	7.003	1.001	0.001
ATCG00670	2.044	-1.907	0.005
AT3G15530	4.761	1	0.004
ATCG00710	3.826	-2.899	0.008
ATCG00720	2.959	-1.005	0.048
ATCG00730	3.51	-1.568	0.007
ATCG00750	0.659	-2.142	0.044
AT3G26510	3.589	1	0.017
ATMG00640	2.097	-2.537	0
AT5G46780	6.327	1	0
ATMG01330	2.637	-1.365	0.008

## Sheet: Arabi C3H-KD upregulated GO_BP
source	term_name	term_id	adjusted_p_value	negative_log10_of_adjusted_p_value	term_size	query_size	intersection_size	effective_domain_size	intersections
GO:BP	cellular response to hypoxia	GO:0071456	7.75934e-95	94.1102	242	781	111	23093	AT1G15010,AT4G24110,AT4G01360,AT1G76650,AT5G62520,AT5G57560,AT1G14540,AT5G42380,AT5G59820,AT4G24570,AT4G10265,AT5G45340,AT3G46080,AT4G29780,AT1G68840,AT1G07135,AT4G13395,AT1G35140,AT1G19020,AT4G27280,AT1G57630,AT5G27420,AT3G04640,AT2G46400,AT2G40000,AT1G76600,AT1G18300,AT4G32480,AT1G27730,AT1G23710,AT1G32928,AT2G22500,AT3G55980,AT4G20860,AT1G33055,AT4G27657,AT3G56400,AT1G66090,AT5G19240,AT1G72910…
GO:BP	cellular response to decreased oxygen levels	GO:0036294	2.47053e-94	93.6072	244	781	111	23093	AT1G15010,AT4G24110,AT4G01360,AT1G76650,AT5G62520,AT5G57560,AT1G14540,AT5G42380,AT5G59820,AT4G24570,AT4G10265,AT5G45340,AT3G46080,AT4G29780,AT1G68840,AT1G07135,AT4G13395,AT1G35140,AT1G19020,AT4G27280,AT1G57630,AT5G27420,AT3G04640,AT2G46400,AT2G40000,AT1G76600,AT1G18300,AT4G32480,AT1G27730,AT1G23710,AT1G32928,AT2G22500,AT3G55980,AT4G20860,AT1G33055,AT4G27657,AT3G56400,AT1G66090,AT5G19240,AT1G72910…
GO:BP	cellular response to oxygen levels	GO:0071453	2.47053e-94	93.6072	244	781	111	23093	AT1G15010,AT4G24110,AT4G01360,AT1G76650,AT5G62520,AT5G57560,AT1G14540,AT5G42380,AT5G59820,AT4G24570,AT4G10265,AT5G45340,AT3G46080,AT4G29780,AT1G68840,AT1G07135,AT4G13395,AT1G35140,AT1G19020,AT4G27280,AT1G57630,AT5G27420,AT3G04640,AT2G46400,AT2G40000,AT1G76600,AT1G18300,AT4G32480,AT1G27730,AT1G23710,AT1G32928,AT2G22500,AT3G55980,AT4G20860,AT1G33055,AT4G27657,AT3G56400,AT1G66090,AT5G19240,AT1G72910…
GO:BP	response to hypoxia	GO:0001666	4.26306e-90	89.3703	268	781	112	23093	AT1G15010,AT4G24110,AT4G01360,AT1G76650,AT5G62520,AT5G57560,AT1G14540,AT5G42380,AT5G59820,AT4G24570,AT4G10265,AT5G45340,AT3G46080,AT4G29780,AT1G68840,AT1G07135,AT4G13395,AT1G35140,AT1G19020,AT4G27280,AT1G57630,AT5G27420,AT3G04640,AT2G46400,AT2G40000,AT1G76600,AT1G18300,AT4G32480,AT1G27730,AT1G23710,AT1G32928,AT2G22500,AT3G55980,AT4G20860,AT1G33055,AT4G27657,AT3G56400,AT1G66090,AT5G19240,AT1G72910…
GO:BP	response to decreased oxygen levels	GO:0036293	3.21446e-89	88.4929	272	781	112	23093	AT1G15010,AT4G24110,AT4G01360,AT1G76650,AT5G62520,AT5G57560,AT1G14540,AT5G42380,AT5G59820,AT4G24570,AT4G10265,AT5G45340,AT3G46080,AT4G29780,AT1G68840,AT1G07135,AT4G13395,AT1G35140,AT1G19020,AT4G27280,AT1G57630,AT5G27420,AT3G04640,AT2G46400,AT2G40000,AT1G76600,AT1G18300,AT4G32480,AT1G27730,AT1G23710,AT1G32928,AT2G22500,AT3G55980,AT4G20860,AT1G33055,AT4G27657,AT3G56400,AT1G66090,AT5G19240,AT1G72910…
GO:BP	response to oxygen levels	GO:0070482	5.29231e-89	88.2764	273	781	112	23093	AT1G15010,AT4G24110,AT4G01360,AT1G76650,AT5G62520,AT5G57560,AT1G14540,AT5G42380,AT5G59820,AT4G24570,AT4G10265,AT5G45340,AT3G46080,AT4G29780,AT1G68840,AT1G07135,AT4G13395,AT1G35140,AT1G19020,AT4G27280,AT1G57630,AT5G27420,AT3G04640,AT2G46400,AT2G40000,AT1G76600,AT1G18300,AT4G32480,AT1G27730,AT1G23710,AT1G32928,AT2G22500,AT3G55980,AT4G20860,AT1G33055,AT4G27657,AT3G56400,AT1G66090,AT5G19240,AT1G72910…
GO:BP	response to stress	GO:0006950	1.98337e-84	83.7026	4066	781	374	23093	AT1G15010,AT5G06730,AT4G24110,AT3G28340,AT4G01360,AT1G76650,AT2G36450,AT5G64110,AT1G12610,AT5G62520,AT5G57560,AT1G58420,AT5G24110,AT3G23250,AT5G19880,AT5G52020,AT4G34410,AT1G14540,AT5G42380,AT4G37290,AT2G44840,AT3G02840,AT3G61190,AT3G20340,AT5G59820,AT4G24570,AT4G10265,AT5G45340,AT4G21840,AT1G30135,AT5G13080,AT1G80840,AT2G34600,AT4G36430,AT3G46080,AT4G29780,AT3G11340,AT5G51190,AT4G25490,AT1G68840…
GO:BP	response to chemical	GO:0042221	3.21183e-80	79.4932	3378	781	333	23093	AT1G15010,AT5G06730,AT4G24110,AT4G01360,AT1G76650,AT1G33760,AT5G21960,AT2G36450,AT5G64110,AT1G12610,AT5G62520,AT5G57560,AT1G19210,AT5G24110,AT3G44350,AT3G23250,AT5G19880,AT5G52020,AT4G34410,AT1G66160,AT1G14540,AT5G42380,AT4G37290,AT2G44840,AT3G02840,AT3G61190,AT5G59820,AT4G24570,AT4G10265,AT5G45340,AT1G30135,AT1G80840,AT2G34600,AT4G36430,AT3G46080,AT4G29780,AT5G51190,AT1G68840,AT1G07135,AT4G13395…
GO:BP	response to stimulus	GO:0050896	6.36047e-75	74.1965	6758	781	476	23093	AT1G15010,AT5G06730,AT4G24110,AT5G17350,AT3G28340,AT4G01360,AT1G76650,AT1G33760,AT5G21960,AT2G36450,AT5G64110,AT1G12610,AT5G62520,AT5G57560,AT1G19210,AT1G58420,AT5G24110,AT3G44350,AT3G23250,AT5G19880,AT5G52020,AT4G34410,AT1G66160,AT1G14540,AT5G42380,AT4G37290,AT2G32130,AT2G44840,AT3G02840,AT3G61190,AT3G20340,AT5G59820,AT4G24570,AT4G10265,AT5G45340,AT4G21840,AT1G30135,AT5G13080,AT1G80840,AT2G34600…
GO:BP	cellular response to chemical stimulus	GO:0070887	5.72525e-63	62.2422	1802	781	218	23093	AT1G15010,AT5G06730,AT4G24110,AT4G01360,AT1G76650,AT1G33760,AT5G21960,AT2G36450,AT5G64110,AT5G62520,AT5G57560,AT1G19210,AT5G19880,AT5G52020,AT4G34410,AT1G14540,AT5G42380,AT2G44840,AT5G59820,AT4G24570,AT4G10265,AT5G45340,AT1G30135,AT2G34600,AT4G36430,AT3G46080,AT4G29780,AT5G51190,AT1G68840,AT1G07135,AT4G13395,AT4G17490,AT1G35140,AT1G13670,AT1G19020,AT4G27280,AT1G57630,AT1G74930,AT5G64120,AT1G28480…
GO:BP	response to external biotic stimulus	GO:0043207	3.90632e-50	49.4082	1526	781	182	23093	AT1G15010,AT5G17350,AT2G36450,AT5G52020,AT4G34410,AT4G37290,AT1G80840,AT3G11340,AT4G17490,AT3G10930,AT2G35980,AT3G44260,AT1G19020,AT1G74930,AT5G64120,AT2G27080,AT5G27420,AT4G23810,AT5G64810,AT2G46400,AT3G09940,AT2G40000,AT1G24140,AT1G76600,AT3G48520,AT5G61600,AT3G25780,AT1G61120,AT3G50930,AT4G39830,AT3G56400,AT2G30020,AT5G49520,AT1G72520,AT2G38470,AT5G05300,AT4G10500,AT5G03210,AT5G39670,AT5G20230…
GO:BP	response to other organism	GO:0051707	3.90632e-50	49.4082	1526	781	182	23093	AT1G15010,AT5G17350,AT2G36450,AT5G52020,AT4G34410,AT4G37290,AT1G80840,AT3G11340,AT4G17490,AT3G10930,AT2G35980,AT3G44260,AT1G19020,AT1G74930,AT5G64120,AT2G27080,AT5G27420,AT4G23810,AT5G64810,AT2G46400,AT3G09940,AT2G40000,AT1G24140,AT1G76600,AT3G48520,AT5G61600,AT3G25780,AT1G61120,AT3G50930,AT4G39830,AT3G56400,AT2G30020,AT5G49520,AT1G72520,AT2G38470,AT5G05300,AT4G10500,AT5G03210,AT5G39670,AT5G20230…
GO:BP	biological process involved in interspecies interaction between organisms	GO:0044419	4.8576e-50	49.3136	1544	781	183	23093	AT1G15010,AT5G17350,AT2G36450,AT5G52020,AT4G34410,AT4G37290,AT1G80840,AT3G11340,AT4G17490,AT3G10930,AT2G35980,AT3G44260,AT1G19020,AT1G74930,AT5G64120,AT2G27080,AT5G27420,AT4G23810,AT5G64810,AT2G46400,AT3G09940,AT2G40000,AT1G24140,AT1G76600,AT3G48520,AT5G61600,AT3G25780,AT1G61120,AT3G50930,AT4G39830,AT3G56400,AT2G30020,AT5G49520,AT1G72520,AT2G38470,AT5G05300,AT4G10500,AT5G03210,AT5G39670,AT5G20230…
GO:BP	response to abiotic stimulus	GO:0009628	8.90398e-50	49.0504	2279	781	226	23093	AT1G15010,AT4G24110,AT4G01360,AT1G76650,AT1G12610,AT5G62520,AT5G57560,AT3G23250,AT1G14540,AT5G42380,AT4G37290,AT2G32130,AT3G61190,AT5G59820,AT4G24570,AT4G10265,AT5G45340,AT3G46080,AT2G22880,AT4G29780,AT5G51190,AT4G25490,AT1G68840,AT1G07135,AT4G13395,AT4G17490,AT1G35140,AT3G10930,AT5G52050,AT1G19020,AT4G27280,AT1G57630,AT5G48540,AT1G65500,AT5G27420,AT4G25470,AT3G04640,AT2G46400,AT3G09940,AT2G40000…
GO:BP	defense response	GO:0006952	2.74286e-49	48.5618	1790	781	197	23093	AT1G15010,AT2G36450,AT1G58420,AT5G52020,AT4G34410,AT4G37290,AT2G44840,AT3G61190,AT1G30135,AT1G80840,AT2G34600,AT3G11340,AT4G17490,AT3G10930,AT2G35980,AT3G44260,AT1G57630,AT1G74930,AT5G64120,AT2G27080,AT5G27420,AT4G23810,AT5G64810,AT2G46400,AT2G32140,AT2G40000,AT5G41750,AT4G11280,AT1G24140,AT3G48520,AT5G61600,AT5G47230,AT3G50930,AT4G39830,AT3G56400,AT1G66090,AT2G30020,AT1G72910,AT5G49520,AT4G25110…
GO:BP	response to oxygen-containing compound	GO:1901700	3.43973e-49	48.4635	1826	781	199	23093	AT1G12610,AT5G57560,AT5G24110,AT3G44350,AT3G23250,AT4G34410,AT1G66160,AT5G42380,AT2G44840,AT3G02840,AT3G61190,AT5G59820,AT5G45340,AT1G30135,AT1G80840,AT2G34600,AT3G46080,AT5G51190,AT4G17490,AT3G10930,AT5G52050,AT1G19020,AT1G28480,AT1G65500,AT5G27420,AT4G23810,AT5G64810,AT2G46400,AT3G09940,AT2G40000,AT4G11280,AT1G01560,AT3G28580,AT3G19580,AT5G50915,AT1G27730,AT5G47230,AT1G61120,AT3G55980,AT3G50930…
GO:BP	response to biotic stimulus	GO:0009607	5.47714e-49	48.2614	1553	781	182	23093	AT1G15010,AT5G17350,AT2G36450,AT5G52020,AT4G34410,AT4G37290,AT1G80840,AT3G11340,AT4G17490,AT3G10930,AT2G35980,AT3G44260,AT1G19020,AT1G74930,AT5G64120,AT2G27080,AT5G27420,AT4G23810,AT5G64810,AT2G46400,AT3G09940,AT2G40000,AT1G24140,AT1G76600,AT3G48520,AT5G61600,AT3G25780,AT1G61120,AT3G50930,AT4G39830,AT3G56400,AT2G30020,AT5G49520,AT1G72520,AT2G38470,AT5G05300,AT4G10500,AT5G03210,AT5G39670,AT5G20230…
GO:BP	response to chitin	GO:0010200	8.53568e-46	45.0688	136	781	58	23093	AT3G44350,AT3G23250,AT4G34410,AT1G66160,AT2G44840,AT5G59820,AT1G80840,AT2G34600,AT3G46080,AT5G51190,AT4G17490,AT5G27420,AT4G23810,AT2G46400,AT3G19580,AT1G27730,AT5G47230,AT3G55980,AT4G37610,AT3G50060,AT3G56400,AT1G64380,AT5G49520,AT2G38470,AT4G17500,AT1G51800,AT5G62020,AT4G37260,AT2G35930,AT2G17040,AT4G01250,AT3G50260,AT3G46600,AT3G16720,AT2G33580,AT4G33050,AT5G67300,AT2G40140,AT5G59550,AT5G47220…
GO:BP	cellular response to stimulus	GO:0051716	8.75013e-46	45.058	3443	781	279	23093	AT1G15010,AT5G06730,AT4G24110,AT4G01360,AT1G76650,AT1G33760,AT5G21960,AT2G36450,AT5G64110,AT5G62520,AT5G57560,AT1G19210,AT5G19880,AT5G52020,AT4G34410,AT1G14540,AT5G42380,AT2G44840,AT5G59820,AT4G24570,AT4G10265,AT5G45340,AT1G30135,AT5G13080,AT2G34600,AT4G36430,AT3G46080,AT4G29780,AT5G51190,AT1G68840,AT1G07135,AT4G13395,AT4G17490,AT1G35140,AT1G13670,AT1G19020,AT4G27280,AT1G57630,AT1G74930,AT5G64120…
GO:BP	response to external stimulus	GO:0009605	8.32911e-44	43.0794	1993	781	200	23093	AT1G15010,AT5G17350,AT2G36450,AT5G57560,AT5G52020,AT4G34410,AT4G37290,AT2G32130,AT5G13080,AT1G80840,AT3G11340,AT4G17490,AT3G10930,AT2G35980,AT3G44260,AT1G19020,AT1G74930,AT5G64120,AT2G27080,AT5G27420,AT4G23810,AT5G64810,AT2G46400,AT3G09940,AT2G40000,AT4G11280,AT1G24140,AT1G76600,AT3G48520,AT5G61600,AT3G25780,AT1G61120,AT3G50930,AT4G39830,AT3G56400,AT2G30020,AT5G49520,AT1G72520,AT2G38470,AT5G05300…
GO:BP	response to organic substance	GO:0010033	4.96352e-41	40.3042	2205	781	207	23093	AT1G33760,AT5G21960,AT2G36450,AT5G57560,AT1G19210,AT5G24110,AT3G44350,AT3G23250,AT5G52020,AT4G34410,AT1G66160,AT4G37290,AT2G44840,AT3G61190,AT5G59820,AT1G30135,AT1G80840,AT2G34600,AT3G46080,AT5G51190,AT1G68840,AT4G17490,AT1G13670,AT5G52050,AT4G27280,AT1G74930,AT1G28480,AT1G28370,AT5G27420,AT4G23810,AT5G64810,AT2G46400,AT3G09940,AT2G40000,AT4G11280,AT1G01560,AT3G28580,AT5G61600,AT3G19580,AT5G50915…
GO:BP	cellular response to stress	GO:0033554	6.53027e-40	39.1851	1296	781	152	23093	AT1G15010,AT4G24110,AT4G01360,AT1G76650,AT5G62520,AT5G57560,AT1G14540,AT5G42380,AT5G59820,AT4G24570,AT4G10265,AT5G45340,AT5G13080,AT3G46080,AT4G29780,AT1G68840,AT1G07135,AT4G13395,AT1G35140,AT1G19020,AT4G27280,AT1G57630,AT5G27420,AT3G04640,AT2G46400,AT2G40000,AT1G76600,AT1G18300,AT4G32480,AT1G27730,AT1G23710,AT1G32928,AT2G22500,AT3G55980,AT3G50930,AT4G20860,AT1G33055,AT4G27657,AT3G56400,AT1G66090…
GO:BP	defense response to other organism	GO:0098542	7.38305e-39	38.1318	1243	781	147	23093	AT1G15010,AT2G36450,AT5G52020,AT4G34410,AT4G37290,AT1G80840,AT3G10930,AT2G35980,AT3G44260,AT1G74930,AT5G64120,AT2G27080,AT5G27420,AT4G23810,AT5G64810,AT2G46400,AT2G40000,AT1G24140,AT3G48520,AT5G61600,AT3G50930,AT4G39830,AT3G56400,AT2G30020,AT5G49520,AT2G38470,AT5G05300,AT4G10500,AT5G03210,AT5G39670,AT5G44430,AT5G22250,AT1G51800,AT5G37770,AT3G22600,AT3G57260,AT5G25440,AT5G42235,AT2G01180,AT4G20830…
GO:BP	response to organonitrogen compound	GO:0010243	9.07205e-29	28.0423	281	781	61	23093	AT3G44350,AT3G23250,AT4G34410,AT1G66160,AT2G44840,AT5G59820,AT1G80840,AT2G34600,AT3G46080,AT5G51190,AT4G17490,AT5G27420,AT4G23810,AT2G46400,AT3G19580,AT1G27730,AT5G47230,AT3G55980,AT4G37610,AT3G50060,AT3G56400,AT1G64380,AT5G49520,AT2G38470,AT4G17500,AT1G51800,AT5G62020,AT4G37260,AT2G35930,AT2G17040,AT4G01250,AT3G50260,AT1G61340,AT3G46600,AT3G16720,AT2G33580,AT4G33050,AT5G67300,AT2G40140,AT5G59550…
GO:BP	response to bacterium	GO:0009617	5.94756e-28	27.2257	561	781	84	23093	AT1G80840,AT3G10930,AT3G44260,AT1G19020,AT2G27080,AT5G27420,AT4G23810,AT5G64810,AT2G46400,AT2G40000,AT1G61120,AT3G50930,AT3G56400,AT5G49520,AT1G72520,AT2G38470,AT5G05300,AT4G10500,AT5G39670,AT5G22250,AT1G51800,AT3G22600,AT5G25440,AT1G19180,AT5G03350,AT3G50260,AT5G01900,AT5G06320,AT5G26920,AT1G61340,AT2G23810,AT3G20600,AT4G23180,AT3G26830,AT2G32680,AT4G12480,AT5G49450,AT4G02380,AT5G67300,AT1G18570…
GO:BP	response to nitrogen compound	GO:1901698	2.84338e-27	26.5462	341	781	65	23093	AT3G44350,AT3G23250,AT4G34410,AT1G66160,AT2G44840,AT5G59820,AT1G80840,AT2G34600,AT3G46080,AT5G51190,AT4G17490,AT5G27420,AT4G23810,AT2G46400,AT3G19580,AT1G27730,AT5G47230,AT3G55980,AT3G48360,AT4G37610,AT3G50060,AT3G56400,AT1G64380,AT5G49520,AT2G38470,AT4G17500,AT1G51800,AT5G62020,AT4G37260,AT2G35930,AT2G17040,AT4G01250,AT3G50260,AT1G61340,AT3G46600,AT3G16720,AT2G33580,AT3G44300,AT4G33050,AT5G67300…
GO:BP	response to wounding	GO:0009611	2.2287e-26	25.6519	227	781	53	23093	AT1G76650,AT3G61190,AT5G59820,AT1G30135,AT1G80840,AT2G34600,AT3G44260,AT1G19020,AT1G74930,AT4G11280,AT3G48520,AT1G27730,AT1G61120,AT3G48360,AT2G30020,AT1G72920,AT1G72520,AT2G24850,AT3G44860,AT1G32920,AT5G24090,AT1G19180,AT1G17420,AT5G56550,AT5G06320,AT1G61340,AT3G51440,AT1G17380,AT4G02380,AT4G35770,AT5G56980,AT1G73500,AT1G32640,AT1G15380,AT2G46510,AT3G54150,AT5G44420,AT3G45640,AT3G45140,AT5G47240…
GO:BP	response to endogenous stimulus	GO:0009719	2.43038e-21	20.6143	1714	781	143	23093	AT1G33760,AT5G21960,AT2G36450,AT5G57560,AT1G19210,AT5G52020,AT4G34410,AT4G37290,AT2G44840,AT1G30135,AT2G34600,AT5G51190,AT1G68840,AT4G17490,AT1G13670,AT5G52050,AT4G27280,AT1G74930,AT1G28480,AT1G28370,AT5G27420,AT4G23810,AT5G64810,AT2G46400,AT3G09940,AT4G11280,AT1G01560,AT3G28580,AT5G61600,AT3G19580,AT5G50915,AT1G27730,AT5G47230,AT1G61120,AT1G79130,AT3G48360,AT4G37610,AT4G20860,AT3G50060,AT3G56400…
GO:BP	response to hormone	GO:0009725	2.44665e-21	20.6114	1676	781	141	23093	AT1G33760,AT5G21960,AT2G36450,AT5G57560,AT1G19210,AT5G52020,AT4G34410,AT4G37290,AT2G44840,AT1G30135,AT2G34600,AT5G51190,AT1G68840,AT4G17490,AT1G13670,AT5G52050,AT4G27280,AT1G74930,AT1G28480,AT1G28370,AT5G27420,AT4G23810,AT5G64810,AT2G46400,AT3G09940,AT4G11280,AT1G01560,AT3G28580,AT5G61600,AT3G19580,AT5G50915,AT1G27730,AT5G47230,AT1G61120,AT1G79130,AT3G48360,AT4G37610,AT4G20860,AT3G50060,AT3G56400…
GO:BP	response to jasmonic acid	GO:0009753	1.81267e-20	19.7417	220	781	46	23093	AT1G30135,AT2G34600,AT1G28480,AT4G23810,AT5G64810,AT2G46400,AT3G09940,AT4G11280,AT1G61120,AT3G48360,AT4G20860,AT3G56400,AT2G24850,AT3G44860,AT1G19180,AT1G17420,AT3G23240,AT5G13330,AT1G61340,AT3G51440,AT1G17380,AT4G35770,AT5G26170,AT5G67300,AT5G56980,AT5G45110,AT5G47220,AT2G39030,AT1G32640,AT3G50480,AT1G15380,AT3G52430,AT5G44420,AT3G55970,AT3G45140,AT1G06160,AT5G64900,AT5G13220,AT3G15356,AT5G08790…
GO:BP	response to fatty acid	GO:0070542	4.03025e-20	19.3947	224	781	46	23093	AT1G30135,AT2G34600,AT1G28480,AT4G23810,AT5G64810,AT2G46400,AT3G09940,AT4G11280,AT1G61120,AT3G48360,AT4G20860,AT3G56400,AT2G24850,AT3G44860,AT1G19180,AT1G17420,AT3G23240,AT5G13330,AT1G61340,AT3G51440,AT1G17380,AT4G35770,AT5G26170,AT5G67300,AT5G56980,AT5G45110,AT5G47220,AT2G39030,AT1G32640,AT3G50480,AT1G15380,AT3G52430,AT5G44420,AT3G55970,AT3G45140,AT1G06160,AT5G64900,AT5G13220,AT3G15356,AT5G08790…
GO:BP	regulation of defense response	GO:0031347	1.97031e-19	18.7055	288	781	51	23093	AT3G61190,AT1G30135,AT1G80840,AT2G34600,AT4G23810,AT4G39830,AT3G56400,AT5G05300,AT5G39670,AT1G51800,AT3G22600,AT5G25440,AT1G19180,AT5G26920,AT3G25882,AT1G17380,AT3G01080,AT3G26830,AT2G32680,AT2G31880,AT4G02380,AT5G67300,AT5G47220,AT5G66210,AT5G13320,AT4G31800,AT3G59700,AT5G05190,AT2G29350,AT3G18690,AT1G02450,AT1G02660,AT1G32640,AT3G52430,AT4G12720,AT1G73805,AT4G22305,AT3G22231,AT4G14400,AT1G11960…
GO:BP	response to salicylic acid	GO:0009751	2.44486e-19	18.6117	182	781	41	23093	AT5G24110,AT3G61190,AT1G80840,AT1G28480,AT4G23810,AT2G46400,AT2G40000,AT3G50930,AT3G48360,AT4G37610,AT3G56400,AT4G10500,AT3G44860,AT1G65510,AT5G03350,AT5G01900,AT5G06320,AT5G13330,AT5G44568,AT1G61340,AT3G51440,AT5G54610,AT2G14560,AT5G67300,AT5G45110,AT5G13320,AT4G31800,AT5G05190,AT3G50480,AT5G08760,AT1G15380,AT5G24530,AT3G52430,AT3G22231,AT4G14400,AT5G14930,AT1G29690,AT5G08790,AT4G03110,AT1G21250…
GO:BP	regulation of response to stress	GO:0080134	1.22923e-18	17.9104	426	781	61	23093	AT3G61190,AT1G30135,AT1G80840,AT2G34600,AT3G10930,AT5G52050,AT4G23810,AT2G46400,AT4G39830,AT3G56400,AT5G05300,AT5G39670,AT1G51800,AT3G22600,AT5G25440,AT4G37260,AT1G19180,AT1G09950,AT3G10040,AT5G56550,AT5G26920,AT3G25882,AT1G17380,AT3G01080,AT3G26830,AT2G32680,AT2G31880,AT4G02380,AT5G67300,AT5G47220,AT5G66210,AT5G13320,AT4G31800,AT3G59700,AT5G05190,AT2G29350,AT3G18690,AT1G02450,AT1G02660,AT1G32640…
GO:BP	defense response to bacterium	GO:0042742	4.42021e-18	17.3546	464	781	63	23093	AT1G80840,AT3G10930,AT3G44260,AT2G27080,AT5G27420,AT4G23810,AT5G64810,AT2G46400,AT2G40000,AT3G56400,AT5G49520,AT2G38470,AT5G05300,AT5G39670,AT5G22250,AT1G51800,AT5G25440,AT1G19180,AT3G50260,AT5G01900,AT5G06320,AT5G26920,AT2G23810,AT3G20600,AT4G23180,AT2G32680,AT4G12480,AT4G02380,AT5G67300,AT1G18570,AT5G56980,AT5G45110,AT2G05940,AT4G23190,AT5G47220,AT5G01540,AT5G66210,AT5G13320,AT4G31800,AT3G59700…
GO:BP	response to oxidative stress	GO:0006979	1.6982e-17	16.77	476	781	63	23093	AT5G06730,AT3G28340,AT5G64110,AT5G24110,AT5G19880,AT1G14540,AT5G42380,AT3G02840,AT3G20340,AT5G59820,AT4G21840,AT4G36430,AT4G17490,AT3G10930,AT1G19020,AT5G64120,AT4G23810,AT5G05340,AT2G40000,AT5G64100,AT4G11280,AT3G28580,AT1G14870,AT1G27730,AT4G21850,AT1G61120,AT3G48360,AT4G37610,AT3G56400,AT1G78410,AT4G08770,AT1G72520,AT5G05300,AT5G20230,AT3G17790,AT5G37770,AT4G33420,AT4G20830,AT5G56550,AT4G02380…
GO:BP	response to organic cyclic compound	GO:0014070	3.82753e-16	15.4171	340	781	51	23093	AT5G57560,AT5G24110,AT3G61190,AT1G80840,AT1G28480,AT4G23810,AT2G46400,AT2G40000,AT3G50930,AT3G48360,AT4G37610,AT3G56400,AT4G10500,AT1G66180,AT3G44860,AT1G65510,AT5G03350,AT5G01900,AT5G06320,AT5G13330,AT5G44568,AT1G61340,AT3G51440,AT5G54610,AT2G14560,AT2G44080,AT5G67300,AT5G62380,AT5G45110,AT5G13320,AT4G31800,AT5G05190,AT2G43570,AT1G32640,AT4G08950,AT5G54380,AT3G50480,AT5G08760,AT1G15380,AT1G13260…
GO:BP	response to lipid	GO:0033993	4.78141e-16	15.3204	1029	781	95	23093	AT5G57560,AT1G30135,AT2G34600,AT5G52050,AT1G28480,AT5G27420,AT4G23810,AT5G64810,AT2G46400,AT3G09940,AT4G11280,AT1G01560,AT3G28580,AT3G19580,AT5G50915,AT1G27730,AT1G61120,AT3G48360,AT4G20860,AT3G56400,AT2G30020,AT2G24850,AT3G22060,AT3G44860,AT1G51800,AT5G37770,AT2G26190,AT1G19180,AT1G09950,AT1G17420,AT3G23240,AT4G27410,AT5G26920,AT5G13330,AT5G62470,AT1G61340,AT3G51440,AT1G48000,AT1G17380,AT3G26830…
GO:BP	signal transduction	GO:0007165	7.27684e-15	14.1381	2097	781	147	23093	AT1G33760,AT5G21960,AT2G36450,AT1G19210,AT5G52020,AT4G34410,AT5G42380,AT2G44840,AT1G30135,AT2G34600,AT5G51190,AT1G68840,AT4G17490,AT1G13670,AT1G57630,AT1G74930,AT1G28480,AT1G28370,AT4G23810,AT5G64810,AT2G46400,AT2G32140,AT5G41750,AT1G01560,AT5G61600,AT3G19580,AT5G47230,AT1G79130,AT3G50930,AT3G48360,AT3G50060,AT3G56400,AT1G66090,AT2G30020,AT2G36890,AT1G64380,AT1G72910,AT1G72920,AT1G25560,AT3G57760…
GO:BP	response to fungus	GO:0009620	9.70235e-15	14.0131	664	781	71	23093	AT1G15010,AT5G17350,AT2G36450,AT5G52020,AT4G34410,AT1G80840,AT5G64120,AT5G64810,AT3G09940,AT1G24140,AT1G76600,AT5G61600,AT3G25780,AT3G56400,AT2G30020,AT2G38470,AT4G10500,AT5G44430,AT3G44860,AT1G51800,AT3G22600,AT5G42235,AT4G20830,AT3G52400,AT1G17420,AT5G26920,AT3G51440,AT4G08870,AT3G50470,AT2G39200,AT3G20600,AT3G26830,AT2G32680,AT2G14560,AT4G12480,AT4G02380,AT2G26010,AT5G26170,AT5G67300,AT2G40140…
GO:BP	signaling	GO:0023052	1.81714e-14	13.7406	2140	781	148	23093	AT1G33760,AT5G21960,AT2G36450,AT1G19210,AT5G52020,AT4G34410,AT5G42380,AT2G44840,AT1G30135,AT2G34600,AT5G51190,AT1G68840,AT4G17490,AT1G13670,AT1G57630,AT1G74930,AT1G28480,AT1G28370,AT4G23810,AT5G64810,AT2G46400,AT2G32140,AT5G41750,AT1G01560,AT5G61600,AT3G19580,AT5G47230,AT1G79130,AT3G50930,AT3G48360,AT3G50060,AT3G56400,AT1G66090,AT2G30020,AT2G36890,AT1G64380,AT1G72910,AT1G72920,AT1G25560,AT3G57760…
GO:BP	regulation of response to external stimulus	GO:0032101	2.45333e-14	13.6102	210	781	38	23093	AT5G13080,AT4G39830,AT3G56400,AT5G05300,AT5G39670,AT1G51800,AT3G22600,AT5G25440,AT5G26920,AT3G25882,AT3G26830,AT2G32680,AT4G02380,AT5G67300,AT5G47220,AT5G66210,AT5G13320,AT3G59700,AT5G05190,AT3G18690,AT1G02450,AT1G32640,AT3G52430,AT4G12720,AT1G73805,AT4G22305,AT3G22231,AT4G14400,AT1G11960,AT3G55970,AT5G13220,AT5G14930,AT2G29460,AT5G13190,AT1G07000,AT5G05600,AT1G32540,AT5G24590
GO:BP	regulation of response to stimulus	GO:0048583	3.85562e-14	13.4139	798	781	78	23093	AT4G34410,AT3G61190,AT1G30135,AT5G13080,AT1G80840,AT2G34600,AT3G10930,AT5G52050,AT4G23810,AT2G46400,AT4G39830,AT3G50060,AT3G56400,AT5G05300,AT5G39670,AT1G51800,AT3G22600,AT5G25440,AT5G24090,AT4G37260,AT1G19180,AT1G09950,AT3G10040,AT5G56550,AT5G26920,AT5G62470,AT3G25882,AT1G17380,AT3G01080,AT3G26830,AT2G32680,AT1G80440,AT2G31880,AT4G02380,AT5G67300,AT5G45110,AT5G47220,AT5G01540,AT5G66210,AT5G13320…
GO:BP	regulation of response to biotic stimulus	GO:0002831	7.10824e-14	13.1482	205	781	37	23093	AT4G39830,AT3G56400,AT5G05300,AT5G39670,AT1G51800,AT3G22600,AT5G25440,AT5G26920,AT3G25882,AT3G26830,AT2G32680,AT4G02380,AT5G67300,AT5G47220,AT5G66210,AT5G13320,AT3G59700,AT5G05190,AT3G18690,AT1G02450,AT1G32640,AT3G52430,AT4G12720,AT1G73805,AT4G22305,AT3G22231,AT4G14400,AT1G11960,AT3G55970,AT5G13220,AT5G14930,AT2G29460,AT5G13190,AT1G07000,AT5G05600,AT1G32540,AT5G24590
GO:BP	cell communication	GO:0007154	2.7044e-13	12.5679	2447	781	159	23093	AT1G33760,AT5G21960,AT2G36450,AT1G19210,AT5G52020,AT4G34410,AT5G42380,AT2G44840,AT1G30135,AT2G34600,AT5G51190,AT1G68840,AT4G17490,AT1G13670,AT1G57630,AT1G74930,AT1G28480,AT1G28370,AT5G27420,AT4G23810,AT5G64810,AT2G46400,AT2G32140,AT5G41750,AT1G01560,AT5G61600,AT3G19580,AT5G47230,AT1G79130,AT3G50930,AT3G48360,AT3G50060,AT3G56400,AT1G66090,AT2G30020,AT2G36890,AT1G64380,AT1G72910,AT1G72920,AT1G25560…
GO:BP	cellular response to organic substance	GO:0071310	3.0375e-13	12.5175	1268	781	102	23093	AT1G33760,AT5G21960,AT2G36450,AT1G19210,AT5G52020,AT4G34410,AT2G44840,AT1G30135,AT2G34600,AT5G51190,AT1G68840,AT4G17490,AT1G13670,AT1G74930,AT1G28480,AT1G28370,AT4G23810,AT5G64810,AT2G46400,AT5G61600,AT3G19580,AT5G50915,AT5G47230,AT1G79130,AT3G50930,AT3G48360,AT3G50060,AT3G56400,AT2G30020,AT1G64380,AT1G25560,AT4G17500,AT1G51800,AT4G30430,AT4G37260,AT1G19180,AT5G03350,AT1G09950,AT3G50260,AT5G01900…
GO:BP	hormone-mediated signaling pathway	GO:0009755	8.58933e-13	12.066	1005	781	87	23093	AT1G33760,AT5G21960,AT2G36450,AT1G19210,AT5G52020,AT4G34410,AT2G44840,AT1G30135,AT2G34600,AT5G51190,AT1G68840,AT4G17490,AT1G13670,AT1G74930,AT1G28480,AT1G28370,AT4G23810,AT5G64810,AT2G46400,AT5G61600,AT3G19580,AT5G47230,AT1G79130,AT3G48360,AT3G50060,AT3G56400,AT2G30020,AT1G64380,AT1G25560,AT4G17500,AT1G51800,AT4G30430,AT4G37260,AT1G19180,AT1G09950,AT3G50260,AT3G23240,AT1G56150,AT5G26920,AT5G13330…
GO:BP	immune system process	GO:0002376	1.03557e-12	11.9848	311	781	44	23093	AT4G37290,AT3G50930,AT3G56400,AT5G05300,AT5G37770,AT3G22600,AT5G25440,AT5G24090,AT2G01180,AT2G35930,AT2G26560,AT5G26920,AT3G50470,AT3G20600,AT5G47070,AT5G54610,AT2G32680,AT4G12480,AT2G33580,AT1G18570,AT4G21390,AT5G47220,AT5G01540,AT5G13320,AT3G18690,AT5G57220,AT3G50480,AT3G52430,AT2G47130,AT4G12720,AT1G73805,AT3G30720,AT3G04210,AT4G22305,AT3G45640,AT1G11960,AT3G50950,AT1G64060,AT5G64900,AT1G29690…
GO:BP	cellular response to hormone stimulus	GO:0032870	2.71891e-12	11.5656	1062	781	89	23093	AT1G33760,AT5G21960,AT2G36450,AT1G19210,AT5G52020,AT4G34410,AT2G44840,AT1G30135,AT2G34600,AT5G51190,AT1G68840,AT4G17490,AT1G13670,AT1G74930,AT1G28480,AT1G28370,AT4G23810,AT5G64810,AT2G46400,AT5G61600,AT3G19580,AT5G50915,AT5G47230,AT1G79130,AT3G48360,AT3G50060,AT3G56400,AT2G30020,AT1G64380,AT1G25560,AT4G17500,AT1G51800,AT4G30430,AT4G37260,AT1G19180,AT1G09950,AT3G50260,AT3G23240,AT1G56150,AT5G26920…
GO:BP	cellular response to endogenous stimulus	GO:0071495	2.95205e-12	11.5299	1101	781	91	23093	AT1G33760,AT5G21960,AT2G36450,AT1G19210,AT5G52020,AT4G34410,AT2G44840,AT1G30135,AT2G34600,AT5G51190,AT1G68840,AT4G17490,AT1G13670,AT1G74930,AT1G28480,AT1G28370,AT4G23810,AT5G64810,AT2G46400,AT5G61600,AT3G19580,AT5G50915,AT5G47230,AT1G79130,AT3G48360,AT3G50060,AT3G56400,AT2G30020,AT1G64380,AT1G25560,AT4G17500,AT1G51800,AT4G30430,AT4G37260,AT1G19180,AT1G09950,AT3G50260,AT3G23240,AT1G56150,AT5G26920…
GO:BP	immune response	GO:0006955	1.23648e-11	10.9078	305	781	42	23093	AT4G37290,AT3G50930,AT3G56400,AT5G05300,AT5G37770,AT3G22600,AT5G25440,AT5G24090,AT2G01180,AT2G26560,AT5G26920,AT3G50470,AT3G20600,AT5G47070,AT5G54610,AT2G32680,AT4G12480,AT2G33580,AT1G18570,AT4G21390,AT5G47220,AT5G01540,AT5G13320,AT3G18690,AT5G57220,AT3G50480,AT3G52430,AT2G47130,AT4G12720,AT1G73805,AT3G30720,AT3G04210,AT4G22305,AT3G45640,AT1G11960,AT3G50950,AT5G64900,AT1G29690,AT5G13190,AT1G61610…
GO:BP	ethylene-activated signaling pathway	GO:0009873	1.54844e-11	10.8101	204	781	34	23093	AT1G33760,AT5G21960,AT2G36450,AT1G19210,AT5G52020,AT4G34410,AT2G44840,AT5G51190,AT1G68840,AT4G17490,AT1G74930,AT1G28370,AT5G61600,AT5G47230,AT3G56400,AT1G64380,AT1G25560,AT4G17500,AT3G50260,AT3G23240,AT5G13330,AT5G47220,AT1G73500,AT1G62300,AT1G22190,AT1G13260,AT4G39780,AT3G52430,AT1G72430,AT1G06160,AT1G64060,AT5G22270,AT3G15356,AT1G36060
GO:BP	cellular response to ethylene stimulus	GO:0071369	4.31681e-11	10.3648	211	781	34	23093	AT1G33760,AT5G21960,AT2G36450,AT1G19210,AT5G52020,AT4G34410,AT2G44840,AT5G51190,AT1G68840,AT4G17490,AT1G74930,AT1G28370,AT5G61600,AT5G47230,AT3G56400,AT1G64380,AT1G25560,AT4G17500,AT3G50260,AT3G23240,AT5G13330,AT5G47220,AT1G73500,AT1G62300,AT1G22190,AT1G13260,AT4G39780,AT3G52430,AT1G72430,AT1G06160,AT1G64060,AT5G22270,AT3G15356,AT1G36060
GO:BP	innate immune response	GO:0045087	5.61288e-11	10.2508	264	781	38	23093	AT4G37290,AT3G50930,AT3G56400,AT5G05300,AT5G37770,AT3G22600,AT2G01180,AT2G26560,AT5G26920,AT3G50470,AT3G20600,AT5G47070,AT5G54610,AT2G32680,AT4G12480,AT2G33580,AT1G18570,AT4G21390,AT5G47220,AT5G13320,AT3G18690,AT5G57220,AT3G50480,AT3G52430,AT2G47130,AT4G12720,AT1G73805,AT3G30720,AT3G04210,AT4G22305,AT3G45640,AT1G11960,AT5G64900,AT1G29690,AT5G13190,AT1G61610,AT4G03110,AT1G32540
GO:BP	response to ethylene	GO:0009723	1.09477e-10	9.96068	283	781	39	23093	AT1G33760,AT5G21960,AT2G36450,AT1G19210,AT5G52020,AT4G34410,AT2G44840,AT5G51190,AT1G68840,AT4G17490,AT1G74930,AT1G28370,AT5G61600,AT5G47230,AT3G56400,AT1G64380,AT1G25560,AT4G17500,AT3G50260,AT3G23240,AT5G13330,AT3G51440,AT4G02380,AT5G47220,AT1G73500,AT1G62300,AT1G22190,AT3G50480,AT1G13260,AT4G39780,AT3G52430,AT5G44420,AT1G72430,AT1G06160,AT1G64060,AT5G22270,AT5G64900,AT3G15356,AT1G36060
GO:BP	response to oomycetes	GO:0002239	2.85177e-10	9.54489	110	781	24	23093	AT3G11340,AT3G56400,AT4G10500,AT5G20230,AT1G51800,AT3G22600,AT4G01700,AT5G26920,AT2G32680,AT3G01290,AT5G01540,AT3G59700,AT4G02520,AT5G60950,AT5G24530,AT1G73805,AT2G39210,AT3G22231,AT4G14400,AT4G04960,AT5G14930,AT3G53810,AT2G02930,AT1G07000
GO:BP	regulation of jasmonic acid mediated signaling pathway	GO:2000022	2.52504e-09	8.59773	41	781	15	23093	AT1G30135,AT2G34600,AT4G23810,AT2G46400,AT3G56400,AT1G19180,AT1G17380,AT5G67300,AT5G45110,AT1G15380,AT3G52430,AT3G55970,AT5G13220,AT1G72450,AT5G05600
GO:BP	phosphorelay signal transduction system	GO:0000160	4.58995e-09	8.33819	261	781	35	23093	AT1G33760,AT5G21960,AT2G36450,AT1G19210,AT5G52020,AT4G34410,AT2G44840,AT5G51190,AT1G68840,AT4G17490,AT1G74930,AT1G28370,AT5G61600,AT5G47230,AT3G56400,AT1G64380,AT1G25560,AT4G17500,AT3G50260,AT3G23240,AT5G13330,AT5G47220,AT1G73500,AT1G62300,AT1G22190,AT1G13260,AT4G39780,AT3G52430,AT3G16360,AT1G72430,AT1G06160,AT1G64060,AT5G22270,AT3G15356,AT1G36060
GO:BP	defense response to fungus	GO:0050832	1.81356e-08	7.74147	576	781	54	23093	AT1G15010,AT2G36450,AT5G52020,AT4G34410,AT1G80840,AT5G64120,AT5G64810,AT1G24140,AT5G61600,AT3G56400,AT2G30020,AT2G38470,AT5G44430,AT1G51800,AT3G22600,AT5G42235,AT4G20830,AT3G52400,AT4G08870,AT3G50470,AT2G39200,AT3G20600,AT3G26830,AT2G32680,AT2G14560,AT4G12480,AT4G02380,AT2G26010,AT5G26170,AT5G67300,AT2G40140,AT5G45110,AT4G31800,AT5G05190,AT5G57220,AT5G54380,AT3G50480,AT2G43510,AT5G44420,AT3G22231…
GO:BP	positive regulation of defense response	GO:0031349	4.29218e-08	7.36732	104	781	21	23093	AT4G39830,AT3G56400,AT1G51800,AT3G22600,AT5G25440,AT2G32680,AT2G31880,AT5G47220,AT5G13320,AT3G18690,AT1G02660,AT3G52430,AT4G12720,AT1G73805,AT3G22231,AT4G14400,AT1G11960,AT5G14930,AT2G29460,AT1G07000,AT1G32540
GO:BP	systemic acquired resistance	GO:0009627	7.05501e-08	7.1515	86	781	19	23093	AT3G56400,AT2G38470,AT3G57260,AT5G03350,AT5G26920,AT5G10760,AT3G25882,AT3G26830,AT5G45110,AT5G13320,AT2G43570,AT1G02450,AT3G52430,AT1G73805,AT1G75040,AT5G55450,AT5G55460,AT5G13220,AT5G14930
GO:BP	response to cold	GO:0009409	1.95583e-07	6.70867	424	781	43	23093	AT1G12610,AT5G57560,AT3G23250,AT3G61190,AT5G59820,AT4G25490,AT1G65500,AT4G25470,AT1G27730,AT5G47230,AT3G48360,AT4G37610,AT2G38470,AT1G18740,AT5G20230,AT1G80820,AT5G37770,AT3G57260,AT5G24090,AT3G50260,AT5G13330,AT5G62470,AT3G16460,AT4G12480,AT4G02380,AT5G20250,AT2G40140,AT4G34150,AT4G02520,AT1G20823,AT1G22190,AT3G49530,AT2G47730,AT3G08720,AT1G15380,AT3G45640,AT4G14400,AT1G01140,AT1G22890,AT1G20450…
GO:BP	defense response to insect	GO:0002213	4.52571e-07	6.34431	33	781	12	23093	AT3G44260,AT1G74930,AT3G48520,AT4G39830,AT2G29350,AT1G02660,AT1G32640,AT5G57220,AT3G52430,AT3G55970,AT2G29460,AT5G05600
GO:BP	positive regulation of response to biotic stimulus	GO:0002833	5.28034e-07	6.27734	96	781	19	23093	AT4G39830,AT3G56400,AT1G51800,AT3G22600,AT5G25440,AT2G32680,AT5G47220,AT5G13320,AT3G18690,AT3G52430,AT4G12720,AT1G73805,AT3G22231,AT4G14400,AT1G11960,AT5G14930,AT2G29460,AT1G07000,AT1G32540
GO:BP	response to acid chemical	GO:0001101	7.23296e-07	6.14068	459	781	44	23093	AT1G12610,AT3G23250,AT5G45340,AT5G52050,AT1G65500,AT2G46400,AT3G09940,AT3G19580,AT1G27730,AT3G04070,AT3G56400,AT2G38470,AT1G52890,AT5G24090,AT2G35930,AT5G56550,AT3G56880,AT4G27410,AT5G26920,AT5G13330,AT5G62470,AT1G61340,AT3G14440,AT5G65730,AT3G26830,AT4G02380,AT5G67300,AT5G59550,AT5G05410,AT3G46620,AT1G32640,AT1G64660,AT1G22190,AT1G15380,AT2G41010,AT2G29120,AT3G45640,AT1G07000,AT1G02930,AT1G22890…
GO:BP	response to inorganic substance	GO:0010035	8.47763e-07	6.07173	1006	781	73	23093	AT1G12610,AT5G24110,AT3G23250,AT5G42380,AT3G02840,AT5G45340,AT3G10930,AT5G52050,AT1G65500,AT4G23810,AT2G46400,AT3G09940,AT3G28580,AT3G19580,AT1G27730,AT1G61120,AT3G48360,AT4G37610,AT3G04070,AT3G56400,AT1G72520,AT2G38470,AT1G52890,AT5G05300,AT5G22530,AT3G17790,AT5G37770,AT5G24090,AT2G35930,AT5G56550,AT3G56880,AT2G26560,AT4G27410,AT5G26920,AT5G13330,AT5G62470,AT3G14440,AT5G65730,AT3G26830,AT2G26530…
GO:BP	positive regulation of response to external stimulus	GO:0032103	9.16471e-07	6.03788	99	781	19	23093	AT4G39830,AT3G56400,AT1G51800,AT3G22600,AT5G25440,AT2G32680,AT5G47220,AT5G13320,AT3G18690,AT3G52430,AT4G12720,AT1G73805,AT3G22231,AT4G14400,AT1G11960,AT5G14930,AT2G29460,AT1G07000,AT1G32540
GO:BP	plant-type hypersensitive response	GO:0009626	1.04761e-06	5.9798	89	781	18	23093	AT3G50930,AT2G01180,AT2G26560,AT5G26920,AT3G50470,AT3G20600,AT5G13320,AT3G50480,AT3G52430,AT2G47130,AT4G12720,AT1G73805,AT4G22305,AT3G45640,AT1G29690,AT5G13190,AT4G03110,AT1G32540
GO:BP	regulation of biological process	GO:0050789	1.23607e-06	5.90796	6137	781	283	23093	AT5G22380,AT1G33760,AT5G21960,AT2G36450,AT1G12610,AT1G19210,AT1G59920,AT5G24110,AT3G44350,AT3G23250,AT5G52020,AT4G34410,AT5G42380,AT4G37290,AT2G44840,AT3G61190,AT5G59820,AT5G64450,AT5G01380,AT1G30135,AT5G13080,AT1G80840,AT2G34600,AT5G22240,AT3G46080,AT5G51190,AT4G25490,AT1G68840,AT4G13395,AT4G17490,AT3G10930,AT3G44260,AT1G13670,AT5G52050,AT1G57630,AT1G74930,AT1G06150,AT1G28480,AT1G28370,AT1G61470…
GO:BP	programmed cell death induced by symbiont	GO:0034050	1.26866e-06	5.89665	90	781	18	23093	AT3G50930,AT2G01180,AT2G26560,AT5G26920,AT3G50470,AT3G20600,AT5G13320,AT3G50480,AT3G52430,AT2G47130,AT4G12720,AT1G73805,AT4G22305,AT3G45640,AT1G29690,AT5G13190,AT4G03110,AT1G32540
GO:BP	biological process involved in interaction with symbiont	GO:0051702	1.53215e-06	5.8147	91	781	18	23093	AT3G50930,AT2G01180,AT2G26560,AT5G26920,AT3G50470,AT3G20600,AT5G13320,AT3G50480,AT3G52430,AT2G47130,AT4G12720,AT1G73805,AT4G22305,AT3G45640,AT1G29690,AT5G13190,AT4G03110,AT1G32540
GO:BP	cellular response to jasmonic acid stimulus	GO:0071395	2.07783e-06	5.68239	127	781	21	23093	AT1G30135,AT2G34600,AT1G28480,AT4G23810,AT5G64810,AT2G46400,AT3G56400,AT1G19180,AT3G23240,AT1G17380,AT5G26170,AT5G67300,AT5G45110,AT5G47220,AT1G15380,AT3G52430,AT3G55970,AT5G13220,AT3G15356,AT1G72450,AT5G05600
GO:BP	cellular response to oxygen-containing compound	GO:1901701	2.74258e-06	5.56184	794	781	61	23093	AT1G30135,AT2G34600,AT1G28480,AT4G23810,AT5G64810,AT2G46400,AT3G19580,AT3G50930,AT3G48360,AT3G56400,AT2G30020,AT1G51800,AT5G24090,AT1G19180,AT5G03350,AT1G09950,AT5G01900,AT3G23240,AT5G26920,AT5G62470,AT1G17380,AT2G33580,AT5G49450,AT4G02380,AT5G26170,AT5G67300,AT5G45110,AT5G59550,AT5G47220,AT5G01540,AT5G13320,AT5G05190,AT3G46620,AT1G32640,AT1G64660,AT1G15380,AT2G46510,AT3G52430,AT2G29120,AT1G65690…
GO:BP	response to water	GO:0009415	2.86203e-06	5.54333	428	781	41	23093	AT1G12610,AT3G23250,AT5G45340,AT5G52050,AT1G65500,AT2G46400,AT3G09940,AT3G19580,AT1G27730,AT3G04070,AT3G56400,AT2G38470,AT1G52890,AT5G24090,AT2G35930,AT5G56550,AT3G56880,AT4G27410,AT5G26920,AT5G13330,AT5G62470,AT3G14440,AT5G65730,AT3G26830,AT4G02380,AT5G67300,AT5G59550,AT5G05410,AT3G46620,AT1G32640,AT1G64660,AT1G22190,AT1G15380,AT2G41010,AT1G07000,AT1G02930,AT1G22890,AT3G30775,AT1G65486,AT1G20450…
GO:BP	cellular response to fatty acid	GO:0071398	3.71298e-06	5.43028	131	781	21	23093	AT1G30135,AT2G34600,AT1G28480,AT4G23810,AT5G64810,AT2G46400,AT3G56400,AT1G19180,AT3G23240,AT1G17380,AT5G26170,AT5G67300,AT5G45110,AT5G47220,AT1G15380,AT3G52430,AT3G55970,AT5G13220,AT3G15356,AT1G72450,AT5G05600
GO:BP	response to reactive oxygen species	GO:0000302	5.20029e-06	5.28397	159	781	23	23093	AT5G24110,AT5G42380,AT3G02840,AT4G17490,AT3G10930,AT1G19020,AT4G23810,AT3G28580,AT1G61120,AT3G48360,AT4G37610,AT3G56400,AT1G72520,AT5G05300,AT3G17790,AT5G37770,AT4G02380,AT5G05410,AT4G12720,AT4G18880,AT1G32540,AT5G67480,AT5G01600
GO:BP	jasmonic acid mediated signaling pathway	GO:0009867	5.89887e-06	5.22923	122	781	20	23093	AT1G30135,AT2G34600,AT1G28480,AT4G23810,AT5G64810,AT2G46400,AT3G56400,AT1G19180,AT3G23240,AT1G17380,AT5G26170,AT5G67300,AT5G45110,AT5G47220,AT1G15380,AT3G52430,AT3G55970,AT5G13220,AT1G72450,AT5G05600
GO:BP	biological process involved in symbiotic interaction	GO:0044403	6.82401e-06	5.16596	123	781	20	23093	AT3G09940,AT3G50930,AT2G01180,AT2G26560,AT5G26920,AT3G50470,AT3G20600,AT5G13320,AT3G50480,AT3G52430,AT2G47130,AT4G12720,AT1G73805,AT2G43510,AT4G22305,AT3G45640,AT1G29690,AT5G13190,AT4G03110,AT1G32540
GO:BP	response to temperature stimulus	GO:0009266	9.85096e-06	5.00652	666	781	53	23093	AT1G12610,AT5G57560,AT3G23250,AT3G61190,AT5G59820,AT5G51190,AT4G25490,AT1G65500,AT4G25470,AT1G27730,AT5G47230,AT3G48360,AT4G37610,AT2G38470,AT3G57760,AT1G18740,AT5G20230,AT1G80820,AT5G37770,AT3G57260,AT5G24090,AT3G50260,AT5G13330,AT5G62470,AT3G16460,AT3G51910,AT4G12480,AT4G02380,AT5G20250,AT5G67300,AT2G40140,AT4G34150,AT5G05410,AT4G02520,AT1G20823,AT1G22190,AT3G49530,AT2G47730,AT3G08720,AT1G15380…
GO:BP	response to water deprivation	GO:0009414	1.36911e-05	4.86356	417	781	39	23093	AT1G12610,AT3G23250,AT5G45340,AT5G52050,AT1G65500,AT2G46400,AT3G09940,AT3G19580,AT1G27730,AT3G56400,AT2G38470,AT1G52890,AT5G24090,AT2G35930,AT5G56550,AT3G56880,AT4G27410,AT5G26920,AT5G13330,AT5G62470,AT3G14440,AT5G65730,AT3G26830,AT4G02380,AT5G67300,AT5G59550,AT5G05410,AT3G46620,AT1G32640,AT1G64660,AT1G22190,AT1G15380,AT2G41010,AT1G07000,AT1G02930,AT1G22890,AT3G30775,AT1G65486,AT1G20450
GO:BP	cell death	GO:0008219	2.42739e-05	4.61486	215	781	26	23093	AT3G50930,AT4G25110,AT1G72940,AT2G01180,AT3G50260,AT2G26560,AT5G26920,AT3G50470,AT3G20600,AT2G31880,AT5G62380,AT5G13320,AT3G50480,AT3G52430,AT2G47130,AT4G12720,AT1G73805,AT4G22305,AT3G45640,AT4G14400,AT1G64060,AT1G29690,AT5G13190,AT4G03110,AT5G47910,AT1G32540
GO:BP	cellular response to salicylic acid stimulus	GO:0071446	2.66806e-05	4.5738	85	781	16	23093	AT1G28480,AT3G50930,AT3G56400,AT5G03350,AT5G01900,AT5G67300,AT5G45110,AT5G13320,AT5G05190,AT1G15380,AT3G52430,AT3G22231,AT4G14400,AT5G14930,AT1G29690,AT4G03110
GO:BP	indole-containing compound biosynthetic process	GO:0042435	5.05408e-05	4.29636	57	781	13	23093	AT5G28237,AT3G56400,AT2G38470,AT3G26830,AT3G44300,AT1G18570,AT1G73500,AT1G32640,AT5G57220,AT3G52430,AT3G45640,AT1G07780,AT5G57890
GO:BP	biological regulation	GO:0065007	5.18431e-05	4.28531	6854	781	301	23093	AT5G22380,AT1G33760,AT5G21960,AT2G36450,AT1G12610,AT1G19210,AT1G59920,AT5G24110,AT3G44350,AT3G23250,AT5G52020,AT4G34410,AT5G42380,AT1G64160,AT4G37290,AT2G44840,AT3G47380,AT3G61190,AT5G59820,AT5G64450,AT5G01380,AT1G30135,AT5G13080,AT1G80840,AT2G34600,AT5G22240,AT3G46080,AT5G51190,AT4G25490,AT1G68840,AT4G13395,AT4G17490,AT3G10930,AT3G44260,AT1G13670,AT5G52050,AT1G57630,AT1G74930,AT1G06150,AT1G28480…
GO:BP	salicylic acid mediated signaling pathway	GO:0009863	5.42562e-05	4.26555	78	781	15	23093	AT1G28480,AT3G50930,AT3G56400,AT5G01900,AT5G67300,AT5G45110,AT5G13320,AT5G05190,AT1G15380,AT3G52430,AT3G22231,AT4G14400,AT5G14930,AT1G29690,AT4G03110
GO:BP	response to karrikin	GO:0080167	5.77303e-05	4.2386	126	781	19	23093	AT4G24110,AT4G37290,AT4G27280,AT5G48540,AT1G61890,AT2G36080,AT5G18470,AT1G06520,AT5G20250,AT2G34650,AT2G47730,AT4G35110,AT5G40780,AT3G57520,AT5G05600,AT4G34710,AT5G57710,AT1G70420,AT4G37370
GO:BP	response to abscisic acid	GO:0009737	7.07835e-05	4.15007	629	781	49	23093	AT5G52050,AT5G27420,AT1G01560,AT3G28580,AT3G19580,AT1G27730,AT3G48360,AT2G30020,AT3G22060,AT1G51800,AT5G37770,AT2G26190,AT1G09950,AT4G27410,AT5G26920,AT5G13330,AT5G62470,AT1G61340,AT1G48000,AT3G26830,AT4G12480,AT4G02380,AT5G67300,AT5G62380,AT5G59550,AT5G01540,AT3G46620,AT1G32640,AT1G15380,AT2G46510,AT5G13200,AT1G65690,AT3G45640,AT3G57530,AT3G22231,AT1G64060,AT3G29575,AT3G08040,AT3G21780,AT1G65790…
GO:BP	programmed cell death	GO:0012501	8.78862e-05	4.05608	170	781	22	23093	AT3G50930,AT4G25110,AT2G01180,AT2G26560,AT5G26920,AT3G50470,AT3G20600,AT5G62380,AT5G13320,AT3G50480,AT3G52430,AT2G47130,AT4G12720,AT1G73805,AT4G22305,AT3G45640,AT1G64060,AT1G29690,AT5G13190,AT4G03110,AT5G47910,AT1G32540
GO:BP	indole-containing compound metabolic process	GO:0042430	9.20656e-05	4.0359	81	781	15	23093	AT4G34410,AT5G28237,AT2G40000,AT3G56400,AT2G38470,AT3G26830,AT3G44300,AT1G18570,AT1G73500,AT1G32640,AT5G57220,AT3G52430,AT3G45640,AT1G07780,AT5G57890
GO:BP	regulation of cellular process	GO:0050794	9.98561e-05	4.00063	5482	781	249	23093	AT5G22380,AT1G33760,AT5G21960,AT2G36450,AT1G12610,AT1G19210,AT1G59920,AT5G24110,AT3G44350,AT3G23250,AT5G52020,AT4G34410,AT5G42380,AT2G44840,AT5G59820,AT5G01380,AT1G30135,AT5G13080,AT1G80840,AT2G34600,AT5G22240,AT3G46080,AT5G51190,AT4G25490,AT1G68840,AT4G13395,AT4G17490,AT3G44260,AT1G13670,AT1G57630,AT1G74930,AT1G06150,AT1G28480,AT1G28370,AT1G61470,AT4G25470,AT4G23810,AT5G64810,AT5G05340,AT2G46400…
GO:BP	response to alcohol	GO:0097305	0.000109421	3.9609	638	781	49	23093	AT5G52050,AT5G27420,AT1G01560,AT3G28580,AT3G19580,AT1G27730,AT3G48360,AT2G30020,AT3G22060,AT1G51800,AT5G37770,AT2G26190,AT1G09950,AT4G27410,AT5G26920,AT5G13330,AT5G62470,AT1G61340,AT1G48000,AT3G26830,AT4G12480,AT4G02380,AT5G67300,AT5G62380,AT5G59550,AT5G01540,AT3G46620,AT1G32640,AT1G15380,AT2G46510,AT5G13200,AT1G65690,AT3G45640,AT3G57530,AT3G22231,AT1G64060,AT3G29575,AT3G08040,AT3G21780,AT1G65790…
GO:BP	positive regulation of response to stimulus	GO:0048584	0.000153296	3.81447	267	781	28	23093	AT4G39830,AT3G50060,AT3G56400,AT1G51800,AT3G22600,AT5G25440,AT4G37260,AT5G26920,AT5G62470,AT2G32680,AT2G31880,AT5G67300,AT5G47220,AT5G13320,AT3G18690,AT1G02660,AT3G49530,AT3G52430,AT4G12720,AT1G73805,AT3G22231,AT4G14400,AT1G11960,AT5G14930,AT2G29460,AT1G07000,AT4G03110,AT1G32540
GO:BP	response to osmotic stress	GO:0006970	0.000241166	3.61768	558	781	44	23093	AT5G62520,AT3G23250,AT5G59820,AT3G10930,AT1G65500,AT3G19580,AT1G27730,AT3G48360,AT3G56400,AT2G38470,AT5G05300,AT2G15390,AT2G26190,AT5G24090,AT4G37260,AT1G09950,AT3G56880,AT5G13330,AT1G61340,AT3G14440,AT3G62260,AT4G12480,AT5G49450,AT5G67300,AT1G73500,AT1G22190,AT3G08720,AT1G15380,AT2G41010,AT4G12720,AT1G65690,AT1G48605,AT3G45640,AT3G57530,AT1G64060,AT5G22270,AT3G21780,AT1G01140,AT5G02020,AT1G22890…
GO:BP	defense response to oomycetes	GO:0002229	0.000246488	3.60821	87	781	15	23093	AT3G56400,AT4G10500,AT1G51800,AT5G26920,AT2G32680,AT5G01540,AT3G59700,AT5G24530,AT1G73805,AT3G22231,AT4G14400,AT4G04960,AT5G14930,AT3G53810,AT1G07000
GO:BP	secondary metabolic process	GO:0019748	0.000265101	3.57659	376	781	34	23093	AT1G12610,AT5G52020,AT1G64160,AT5G64120,AT5G05340,AT1G69930,AT3G56400,AT2G38470,AT5G20230,AT1G80820,AT3G12220,AT4G37260,AT5G13330,AT5G62470,AT3G26830,AT1G80440,AT1G18570,AT1G73500,AT1G15670,AT1G32640,AT4G02520,AT5G57220,AT2G47730,AT3G59940,AT3G52430,AT1G67980,AT1G65690,AT3G45640,AT1G61820,AT3G16400,AT2G29460,AT2G02930,AT1G02930,AT1G71030
GO:BP	regulation of signal transduction	GO:0009966	0.000547503	3.26161	335	781	31	23093	AT4G34410,AT1G30135,AT2G34600,AT4G23810,AT2G46400,AT3G50060,AT3G56400,AT1G51800,AT4G37260,AT1G19180,AT1G09950,AT5G26920,AT5G62470,AT1G17380,AT1G80440,AT5G67300,AT5G45110,AT1G15670,AT3G49530,AT3G59940,AT1G15380,AT3G52430,AT1G19770,AT4G14400,AT3G55970,AT5G13220,AT5G66070,AT1G29690,AT4G03110,AT1G72450,AT5G05600
GO:BP	cellular response to lipid	GO:0071396	0.000732314	3.1353	581	781	44	23093	AT1G30135,AT2G34600,AT1G28480,AT4G23810,AT5G64810,AT2G46400,AT3G19580,AT3G48360,AT3G56400,AT2G30020,AT1G51800,AT1G19180,AT1G09950,AT3G23240,AT5G26920,AT5G62470,AT1G17380,AT5G26170,AT5G67300,AT5G45110,AT5G59550,AT5G47220,AT5G01540,AT3G46620,AT1G32640,AT1G15380,AT2G46510,AT3G52430,AT1G65690,AT3G45640,AT3G57530,AT3G22231,AT3G55970,AT1G64060,AT5G13220,AT3G15356,AT1G65790,AT5G66070,AT3G25010,AT1G72450…
GO:BP	regulation of signaling	GO:0023051	0.000804163	3.09466	341	781	31	23093	AT4G34410,AT1G30135,AT2G34600,AT4G23810,AT2G46400,AT3G50060,AT3G56400,AT1G51800,AT4G37260,AT1G19180,AT1G09950,AT5G26920,AT5G62470,AT1G17380,AT1G80440,AT5G67300,AT5G45110,AT1G15670,AT3G49530,AT3G59940,AT1G15380,AT3G52430,AT1G19770,AT4G14400,AT3G55970,AT5G13220,AT5G66070,AT1G29690,AT4G03110,AT1G72450,AT5G05600
GO:BP	regulation of cell communication	GO:0010646	0.00103301	2.98589	345	781	31	23093	AT4G34410,AT1G30135,AT2G34600,AT4G23810,AT2G46400,AT3G50060,AT3G56400,AT1G51800,AT4G37260,AT1G19180,AT1G09950,AT5G26920,AT5G62470,AT1G17380,AT1G80440,AT5G67300,AT5G45110,AT1G15670,AT3G49530,AT3G59940,AT1G15380,AT3G52430,AT1G19770,AT4G14400,AT3G55970,AT5G13220,AT5G66070,AT1G29690,AT4G03110,AT1G72450,AT5G05600
GO:BP	toxin metabolic process	GO:0009404	0.00111952	2.95097	62	781	12	23093	AT1G69930,AT3G56400,AT2G38470,AT3G26830,AT1G73500,AT4G02520,AT2G47730,AT3G52430,AT3G45640,AT2G29460,AT2G02930,AT1G02930
GO:BP	regulation of defense response to bacterium	GO:1900424	0.00186362	2.72964	54	781	11	23093	AT5G39670,AT1G51800,AT5G25440,AT4G02380,AT5G66210,AT3G59700,AT3G52430,AT1G73805,AT4G14400,AT5G14930,AT1G07000
GO:BP	regulation of defense response to insect	GO:2000068	0.00244673	2.61141	13	781	6	23093	AT4G39830,AT1G32640,AT3G52430,AT3G55970,AT2G29460,AT5G05600
GO:BP	camalexin metabolic process	GO:0052317	0.00244673	2.61141	13	781	6	23093	AT3G56400,AT2G38470,AT3G26830,AT1G73500,AT3G52430,AT3G45640
GO:BP	camalexin biosynthetic process	GO:0010120	0.00244673	2.61141	13	781	6	23093	AT3G56400,AT2G38470,AT3G26830,AT1G73500,AT3G52430,AT3G45640
GO:BP	response to salt stress	GO:0009651	0.00314197	2.5028	476	781	37	23093	AT5G62520,AT3G23250,AT5G59820,AT3G10930,AT1G65500,AT3G19580,AT1G27730,AT3G48360,AT2G38470,AT5G05300,AT2G15390,AT2G26190,AT5G24090,AT4G37260,AT1G09950,AT3G56880,AT5G13330,AT1G61340,AT3G14440,AT3G62260,AT4G12480,AT5G49450,AT5G67300,AT1G73500,AT3G08720,AT2G41010,AT4G12720,AT1G48605,AT3G57530,AT5G22270,AT3G21780,AT1G01140,AT5G02020,AT1G22890,AT5G67480,AT4G34710,AT2G30250
GO:BP	response to molecule of bacterial origin	GO:0002237	0.00366406	2.43604	47	781	10	23093	AT1G80840,AT3G50930,AT1G51800,AT3G22600,AT5G26920,AT2G32680,AT4G31800,AT1G73805,AT1G07000,AT5G24590
GO:BP	leaf senescence	GO:0010150	0.00400893	2.39697	150	781	18	23093	AT5G24110,AT3G11340,AT2G35980,AT4G23810,AT3G56400,AT4G10500,AT4G01250,AT4G27410,AT2G39200,AT4G02380,AT1G73500,AT2G43570,AT1G69490,AT5G24530,AT3G52430,AT5G14930,AT5G08790,AT3G25010
GO:BP	phytoalexin metabolic process	GO:0052314	0.00415909	2.381	14	781	6	23093	AT3G56400,AT2G38470,AT3G26830,AT1G73500,AT3G52430,AT3G45640
GO:BP	phytoalexin biosynthetic process	GO:0052315	0.00415909	2.381	14	781	6	23093	AT3G56400,AT2G38470,AT3G26830,AT1G73500,AT3G52430,AT3G45640
GO:BP	indole phytoalexin metabolic process	GO:0046217	0.00415909	2.381	14	781	6	23093	AT3G56400,AT2G38470,AT3G26830,AT1G73500,AT3G52430,AT3G45640
GO:BP	indole phytoalexin biosynthetic process	GO:0009700	0.00415909	2.381	14	781	6	23093	AT3G56400,AT2G38470,AT3G26830,AT1G73500,AT3G52430,AT3G45640
GO:BP	toxin biosynthetic process	GO:0009403	0.00415909	2.381	14	781	6	23093	AT3G56400,AT2G38470,AT3G26830,AT1G73500,AT3G52430,AT3G45640
GO:BP	regulation of immune response	GO:0050776	0.00436169	2.36035	122	781	16	23093	AT3G56400,AT5G05300,AT3G22600,AT5G25440,AT5G24090,AT2G32680,AT5G47220,AT5G01540,AT5G13320,AT3G18690,AT4G12720,AT4G22305,AT1G11960,AT3G50950,AT5G13190,AT1G32540
GO:BP	regulation of immune system process	GO:0002682	0.00436169	2.36035	122	781	16	23093	AT3G56400,AT5G05300,AT3G22600,AT5G25440,AT5G24090,AT2G32680,AT5G47220,AT5G01540,AT5G13320,AT3G18690,AT4G12720,AT4G22305,AT1G11960,AT3G50950,AT5G13190,AT1G32540
GO:BP	intracellular signal transduction	GO:0035556	0.00436392	2.36012	683	781	47	23093	AT1G33760,AT5G21960,AT2G36450,AT1G19210,AT5G52020,AT4G34410,AT5G42380,AT2G44840,AT5G51190,AT1G68840,AT4G17490,AT1G74930,AT1G28370,AT1G01560,AT5G61600,AT5G47230,AT3G56400,AT1G64380,AT1G25560,AT4G17500,AT3G50260,AT3G23240,AT3G50770,AT5G13330,AT5G47220,AT5G66210,AT1G73500,AT1G62300,AT4G15800,AT1G22190,AT3G08720,AT1G13260,AT4G39780,AT3G52430,AT2G29120,AT3G25600,AT3G16360,AT3G45640,AT3G57530,AT1G72430…
GO:BP	anaerobic respiration	GO:0009061	0.00585154	2.23273	9	781	5	23093	AT1G33055,AT1G05575,AT3G10020,AT5G15120,AT2G36220
GO:BP	regulation of systemic acquired resistance	GO:0010112	0.00641349	2.19291	22	781	7	23093	AT5G26920,AT3G25882,AT3G26830,AT5G13320,AT1G02450,AT1G73805,AT5G13220
GO:BP	response to hydrogen peroxide	GO:0042542	0.00677995	2.16877	73	781	12	23093	AT5G24110,AT3G10930,AT4G23810,AT3G48360,AT4G37610,AT5G05300,AT3G17790,AT5G37770,AT4G02380,AT5G05410,AT5G67480,AT5G01600
GO:BP	plant organ senescence	GO:0090693	0.00767653	2.11483	157	781	18	23093	AT5G24110,AT3G11340,AT2G35980,AT4G23810,AT3G56400,AT4G10500,AT4G01250,AT4G27410,AT2G39200,AT4G02380,AT1G73500,AT2G43570,AT1G69490,AT5G24530,AT3G52430,AT5G14930,AT5G08790,AT3G25010
GO:BP	regulation of defense response to fungus	GO:1900150	0.00872075	2.05945	41	781	9	23093	AT1G51800,AT4G02380,AT5G67300,AT5G05190,AT3G22231,AT4G14400,AT3G55970,AT1G07000,AT5G05600
GO:BP	regulation of RNA biosynthetic process	GO:2001141	0.00876851	2.05707	2449	781	122	23093	AT5G22380,AT1G33760,AT5G21960,AT2G36450,AT1G12610,AT1G19210,AT1G59920,AT5G24110,AT3G44350,AT3G23250,AT5G52020,AT4G34410,AT2G44840,AT5G59820,AT5G01380,AT5G13080,AT1G80840,AT5G22240,AT3G46080,AT5G51190,AT4G25490,AT1G68840,AT4G17490,AT1G74930,AT1G06150,AT1G28480,AT1G28370,AT4G25470,AT4G23810,AT5G64810,AT2G46400,AT5G61600,AT3G19580,AT5G50915,AT1G27730,AT5G47230,AT3G55980,AT3G48360,AT4G37610,AT3G50060…
GO:BP	regulation of transcription, DNA-templated	GO:0006355	0.00876851	2.05707	2449	781	122	23093	AT5G22380,AT1G33760,AT5G21960,AT2G36450,AT1G12610,AT1G19210,AT1G59920,AT5G24110,AT3G44350,AT3G23250,AT5G52020,AT4G34410,AT2G44840,AT5G59820,AT5G01380,AT5G13080,AT1G80840,AT5G22240,AT3G46080,AT5G51190,AT4G25490,AT1G68840,AT4G17490,AT1G74930,AT1G06150,AT1G28480,AT1G28370,AT4G25470,AT4G23810,AT5G64810,AT2G46400,AT5G61600,AT3G19580,AT5G50915,AT1G27730,AT5G47230,AT3G55980,AT3G48360,AT4G37610,AT3G50060…
GO:BP	regulation of nucleic acid-templated transcription	GO:1903506	0.00876851	2.05707	2449	781	122	23093	AT5G22380,AT1G33760,AT5G21960,AT2G36450,AT1G12610,AT1G19210,AT1G59920,AT5G24110,AT3G44350,AT3G23250,AT5G52020,AT4G34410,AT2G44840,AT5G59820,AT5G01380,AT5G13080,AT1G80840,AT5G22240,AT3G46080,AT5G51190,AT4G25490,AT1G68840,AT4G17490,AT1G74930,AT1G06150,AT1G28480,AT1G28370,AT4G25470,AT4G23810,AT5G64810,AT2G46400,AT5G61600,AT3G19580,AT5G50915,AT1G27730,AT5G47230,AT3G55980,AT3G48360,AT4G37610,AT3G50060…
GO:BP	detoxification	GO:0098754	0.017597	1.75456	303	781	26	23093	AT5G06730,AT5G64110,AT5G19880,AT1G14540,AT4G36430,AT5G52050,AT5G64120,AT5G05340,AT1G69930,AT5G64100,AT1G61890,AT4G08770,AT4G33420,AT1G11670,AT3G44300,AT4G02520,AT2G47730,AT1G15380,AT1G64060,AT2G36800,AT2G29460,AT2G02930,AT1G02930,AT5G47910,AT1G32540,AT5G65380
GO:BP	regulation of salicylic acid mediated signaling pathway	GO:2000031	0.0205635	1.6869	35	781	8	23093	AT3G56400,AT5G67300,AT5G45110,AT1G15380,AT3G52430,AT4G14400,AT1G29690,AT4G03110
GO:BP	negative regulation of cytokinin-activated signaling pathway	GO:0080037	0.0219571	1.65843	6	781	4	23093	AT1G80440,AT1G15670,AT3G59940,AT1G19770
GO:BP	response to toxic substance	GO:0009636	0.0222014	1.65362	344	781	28	23093	AT5G06730,AT5G64110,AT5G19880,AT1G14540,AT4G36430,AT5G52050,AT5G64120,AT5G05340,AT1G69930,AT5G64100,AT1G61890,AT4G08770,AT4G33420,AT1G11670,AT3G44300,AT4G02520,AT2G47730,AT1G15380,AT1G64060,AT2G36800,AT5G39050,AT2G29460,AT2G02930,AT1G02930,AT5G47910,AT5G05600,AT1G32540,AT5G65380
GO:BP	abscisic acid-activated signaling pathway	GO:0009738	0.0250006	1.60205	273	781	24	23093	AT3G19580,AT3G48360,AT2G30020,AT1G51800,AT1G09950,AT5G26920,AT5G62470,AT5G67300,AT5G59550,AT5G01540,AT3G46620,AT1G32640,AT1G15380,AT2G46510,AT1G65690,AT3G45640,AT3G57530,AT3G22231,AT1G64060,AT1G65790,AT5G66070,AT4G01026,AT1G12240,AT4G18010
GO:BP	regulation of cellular biosynthetic process	GO:0031326	0.0271888	1.56561	2788	781	133	23093	AT5G22380,AT1G33760,AT5G21960,AT2G36450,AT1G12610,AT1G19210,AT1G59920,AT5G24110,AT3G44350,AT3G23250,AT5G52020,AT4G34410,AT2G44840,AT5G59820,AT5G01380,AT5G13080,AT1G80840,AT5G22240,AT3G46080,AT5G51190,AT4G25490,AT1G68840,AT4G17490,AT3G44260,AT1G74930,AT1G06150,AT1G28480,AT1G28370,AT1G61470,AT4G25470,AT4G23810,AT5G64810,AT5G05340,AT2G46400,AT5G61600,AT3G19580,AT5G50915,AT1G27730,AT5G47230,AT3G55980…
GO:BP	regulation of biosynthetic process	GO:0009889	0.0288736	1.5395	2817	781	134	23093	AT5G22380,AT1G33760,AT5G21960,AT2G36450,AT1G12610,AT1G19210,AT1G59920,AT5G24110,AT3G44350,AT3G23250,AT5G52020,AT4G34410,AT2G44840,AT5G59820,AT5G01380,AT5G13080,AT1G80840,AT5G22240,AT3G46080,AT5G51190,AT4G25490,AT1G68840,AT4G17490,AT3G44260,AT1G74930,AT1G06150,AT1G28480,AT1G28370,AT1G61470,AT4G25470,AT4G23810,AT5G64810,AT5G05340,AT2G46400,AT5G61600,AT3G19580,AT5G50915,AT1G27730,AT5G47230,AT3G55980…
GO:BP	regulation of RNA metabolic process	GO:0051252	0.0312735	1.50482	2593	781	125	23093	AT5G22380,AT1G33760,AT5G21960,AT2G36450,AT1G12610,AT1G19210,AT1G59920,AT5G24110,AT3G44350,AT3G23250,AT5G52020,AT4G34410,AT2G44840,AT5G59820,AT5G01380,AT5G13080,AT1G80840,AT5G22240,AT3G46080,AT5G51190,AT4G25490,AT1G68840,AT4G17490,AT3G44260,AT1G74930,AT1G06150,AT1G28480,AT1G28370,AT1G61470,AT4G25470,AT4G23810,AT5G64810,AT2G46400,AT5G61600,AT3G19580,AT5G50915,AT1G27730,AT5G47230,AT3G55980,AT3G48360…
GO:BP	positive regulation of defense response to bacterium	GO:1900426	0.0372973	1.42832	28	781	7	23093	AT1G51800,AT5G25440,AT3G52430,AT1G73805,AT4G14400,AT5G14930,AT1G07000
GO:BP	regulation of cell death	GO:0010941	0.0429167	1.36737	101	781	13	23093	AT4G25110,AT1G72940,AT3G50260,AT3G20600,AT2G31880,AT5G62380,AT5G13320,AT3G52430,AT4G22305,AT1G64060,AT5G13190,AT5G47910,AT1G32540

## Sheet: Arabi C3H-KD downreg GO_BP
source	term_name	term_id	adjusted_p_value	negative_log10_of_adjusted_p_value	term_size	query_size	intersection_size	effective_domain_size	intersections
GO:BP	response to hormone	GO:0009725	9.7455e-06	5.0112	1676	225	42	23093	AT1G04240,AT1G15550,AT1G19050,AT1G20470,AT1G24020,AT1G25470,AT1G28290,AT1G47485,AT1G64625,AT1G68360,AT1G68550,AT1G69530,AT1G73590,AT1G74890,AT1G75500,AT1G78100,AT2G01200,AT2G01760,AT2G16580,AT2G21050,AT2G26710,AT2G35700,AT2G44940,AT2G44990,AT3G02885,AT3G15540,AT3G58850,AT3G62100,AT4G25420,AT4G27950,AT4G28640,AT4G30410,AT4G32810,AT4G34810,AT4G38840,AT5G05860,AT5G20820,AT5G47370,AT5G54060,AT5G62920…
GO:BP	response to endogenous stimulus	GO:0009719	1.84574e-05	4.73383	1714	225	42	23093	AT1G04240,AT1G15550,AT1G19050,AT1G20470,AT1G24020,AT1G25470,AT1G28290,AT1G47485,AT1G64625,AT1G68360,AT1G68550,AT1G69530,AT1G73590,AT1G74890,AT1G75500,AT1G78100,AT2G01200,AT2G01760,AT2G16580,AT2G21050,AT2G26710,AT2G35700,AT2G44940,AT2G44990,AT3G02885,AT3G15540,AT3G58850,AT3G62100,AT4G25420,AT4G27950,AT4G28640,AT4G30410,AT4G32810,AT4G34810,AT4G38840,AT5G05860,AT5G20820,AT5G47370,AT5G54060,AT5G62920…
GO:BP	response to auxin	GO:0009733	4.47358e-05	4.34934	435	225	19	23093	AT1G04240,AT1G20470,AT1G47485,AT1G64625,AT1G73590,AT1G75500,AT2G01200,AT2G16580,AT2G21050,AT2G44990,AT3G15540,AT3G62100,AT4G28640,AT4G32810,AT4G34810,AT4G38840,AT5G20820,AT5G47370,AT5G64770
GO:BP	cellular response to hormone stimulus	GO:0032870	0.000126048	3.89946	1062	225	30	23093	AT1G04240,AT1G15550,AT1G19050,AT1G24020,AT1G25470,AT1G64625,AT1G68360,AT1G68550,AT1G73590,AT1G74890,AT1G75500,AT1G78100,AT2G01200,AT2G01760,AT2G21050,AT2G35700,AT2G44940,AT3G02885,AT3G15540,AT3G58850,AT3G62100,AT4G25420,AT4G27950,AT4G28640,AT4G30410,AT5G05860,AT5G20820,AT5G47370,AT5G54060,AT5G62920
GO:BP	cellular response to endogenous stimulus	GO:0071495	0.000271124	3.56683	1101	225	30	23093	AT1G04240,AT1G15550,AT1G19050,AT1G24020,AT1G25470,AT1G64625,AT1G68360,AT1G68550,AT1G73590,AT1G74890,AT1G75500,AT1G78100,AT2G01200,AT2G01760,AT2G21050,AT2G35700,AT2G44940,AT3G02885,AT3G15540,AT3G58850,AT3G62100,AT4G25420,AT4G27950,AT4G28640,AT4G30410,AT5G05860,AT5G20820,AT5G47370,AT5G54060,AT5G62920
GO:BP	hormone-mediated signaling pathway	GO:0009755	0.00044534	3.35131	1005	225	28	23093	AT1G04240,AT1G15550,AT1G19050,AT1G24020,AT1G25470,AT1G68360,AT1G68550,AT1G73590,AT1G74890,AT1G75500,AT1G78100,AT2G01200,AT2G01760,AT2G21050,AT2G35700,AT2G44940,AT3G02885,AT3G15540,AT3G58850,AT3G62100,AT4G25420,AT4G27950,AT4G28640,AT4G30410,AT5G05860,AT5G20820,AT5G47370,AT5G62920
GO:BP	response to organic substance	GO:0010033	0.00248265	2.60509	2205	225	44	23093	AT1G04240,AT1G15550,AT1G19050,AT1G20470,AT1G24020,AT1G25470,AT1G28290,AT1G47485,AT1G64625,AT1G68360,AT1G68550,AT1G69530,AT1G73590,AT1G74890,AT1G75500,AT1G78100,AT2G01200,AT2G01760,AT2G16580,AT2G21050,AT2G26710,AT2G35700,AT2G40130,AT2G44940,AT2G44990,AT3G02885,AT3G15540,AT3G56770,AT3G58850,AT3G62100,AT4G25420,AT4G27950,AT4G28640,AT4G30410,AT4G32810,AT4G34810,AT4G38840,AT5G05860,AT5G20820,AT5G47370…
GO:BP	syncytium formation	GO:0006949	0.0030486	2.5159	12	225	4	23093	AT1G69530,AT2G03090,AT4G28250,AT4G38210
GO:BP	cellular response to cytokinin stimulus	GO:0071368	0.00314111	2.50292	95	225	8	23093	AT1G19050,AT1G68360,AT1G74890,AT1G78100,AT2G01760,AT4G27950,AT5G54060,AT5G62920
GO:BP	cellular response to organic substance	GO:0071310	0.00477885	2.32068	1268	225	30	23093	AT1G04240,AT1G15550,AT1G19050,AT1G24020,AT1G25470,AT1G64625,AT1G68360,AT1G68550,AT1G73590,AT1G74890,AT1G75500,AT1G78100,AT2G01200,AT2G01760,AT2G21050,AT2G35700,AT2G44940,AT3G02885,AT3G15540,AT3G58850,AT3G62100,AT4G25420,AT4G27950,AT4G28640,AT4G30410,AT5G05860,AT5G20820,AT5G47370,AT5G54060,AT5G62920
GO:BP	amine metabolic process	GO:0009308	0.00577091	2.23876	136	225	9	23093	AT1G31490,AT1G56430,AT1G75500,AT3G53450,AT3G63440,AT5G05860,AT5G15950,AT5G18930,AT5G19530
GO:BP	strigolactone metabolic process	GO:1901600	0.00671369	2.17304	5	225	3	23093	AT1G03055,AT2G44990,AT4G32810
GO:BP	strigolactone biosynthetic process	GO:1901601	0.00671369	2.17304	5	225	3	23093	AT1G03055,AT2G44990,AT4G32810
GO:BP	cytokinin-activated signaling pathway	GO:0009736	0.0229097	1.63998	91	225	7	23093	AT1G19050,AT1G68360,AT1G74890,AT1G78100,AT2G01760,AT4G27950,AT5G62920
GO:BP	response to cytokinin	GO:0009735	0.0296788	1.52755	129	225	8	23093	AT1G19050,AT1G68360,AT1G74890,AT1G78100,AT2G01760,AT4G27950,AT5G54060,AT5G62920
GO:BP	cell fate commitment	GO:0045165	0.0420774	1.37595	100	225	7	23093	AT1G05065,AT1G32240,AT1G47485,AT2G34925,AT5G12235,AT5G42630,AT5G59305
GO:BP	cell-cell signaling involved in cell fate commitment	GO:0045168	0.0446189	1.35048	43	225	5	23093	AT1G05065,AT1G47485,AT2G34925,AT5G12235,AT5G59305
